# Supplementary material for: Mix and match – controlling the functionality of spin-crossover materials through solid solutions and molecular alloys
Source: Royal Society of Chemistry journal article supplement (doi:10.1039/d4dt01855a), 2024-01-01
Supplement: d4dt01855a1.pdf [file d4dt01855a1.pdf]

## Supporting Information

### Mix and Match – Controlling the Functionality of Spin-Crossover Materials Through Solid Solutions and Molecular Alloys

Malcolm A. Halcrow\*

*School of Chemistry, University of Leeds, Woodhouse Lane, Leeds, UK LS2 9JT.  
E-mail: m.a.halcrow@leeds.ac.uk.*

|                                                                                                                                                                      | Page |
|----------------------------------------------------------------------------------------------------------------------------------------------------------------------|------|
| <b>Figure S1</b> Variation of $T_{1/2}$ in $[\text{Fe}_z\text{M}_{1-z}(\text{3-bpp})_2][\text{NCSe}]_2$ with different isomorphous dopant ions.                      | S2   |
| <b>Figure S2</b> Variation of $T_{1/2}$ in $[\text{Fe}_z\text{M}_{1-z}(\text{NCS})_2(\text{phen})_2]$ with different isomorphous dopant ions.                        | S2   |
| <b>Table S1</b> Molecular SCO materials containing isomorphous or non-isomorphous dopant ions, that have been used to study or manipulate SCO cooperativity.         | S3   |
| <b>Scheme S1</b> Ligands listed in Table S1.                                                                                                                         | S5   |
| <b>Table S2</b> Coordination polymer SCO materials containing isomorphous dopant ions, that have been used to study or manipulate SCO cooperativity.                 | S7   |
| <b>Scheme S2</b> Ligands listed in Table S2.                                                                                                                         | S8   |
| <b>Table S3</b> Highly dilute solid solutions of iron(II) complexes in inert host crystals, used to study the photophysics of isolated molecules in the solid state. | S9   |
| <b>Scheme S3</b> Ligands listed in Table S3.                                                                                                                         | S10  |
| <b>Table S4</b> SCO materials containing trace paramagnetic dopant ions, that have been used to probe SCO by EPR spectroscopy.                                       | S11  |
| <b>Scheme S4</b> Ligands listed in Table S4.                                                                                                                         | S12  |
| <b>Table S5</b> Non-stoichiometric mixed anion salts of SCO complexes.                                                                                               | S13  |
| <b>Scheme S5</b> Ligands listed in Table S5.                                                                                                                         | S14  |
| <b>Table S6</b> SCO molecular alloy materials.                                                                                                                       | S15  |
| <b>Scheme S6</b> Ligands listed in Table S6.                                                                                                                         | S17  |
| <b>References</b>                                                                                                                                                    | S18  |

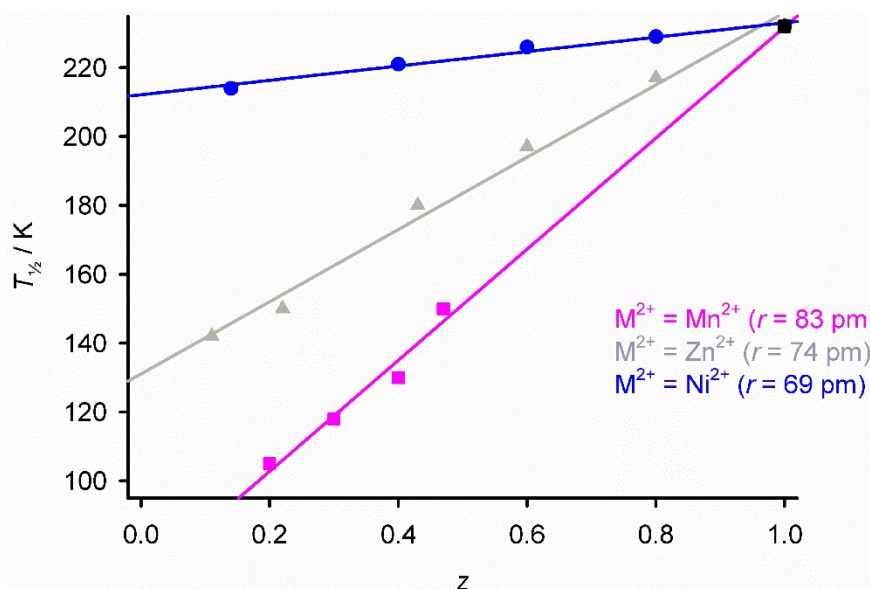

**Figure S1** Variation of  $T_{1/2}$  with composition in  $[\text{Fe}_z\text{M}_{1-z}(\text{3-bpp})_2][\text{NCSe}]_2$  (3-bpp = 2,6-bis{1*H*-pyrazol-3-yl}pyridine, a regioisomer of the 1-bpp ligand in Scheme 1 of the main article) with different dopant ions: M = Mn (■), Zn (▲) and Ni (●). Data for each dopant are linked by a regression line for clarity. The Figure is modified from ref. 1 (copyright the Royal Society of Chemistry), and contains data from refs. 2-4.

All the dopant ions lower  $T_{1/2}$ , in the order: M = Mn > Zn > Ni. That is the trend predicted from the ionic radii of the dopant ions (shown). Larger dopant ions lead to expansion of the lattice, thus reducing the chemical pressure about each iron centre. That stabilises the larger high-spin form of the iron complex ( $r = 78$  pm) and reduces  $T_{1/2}$ , as observed.

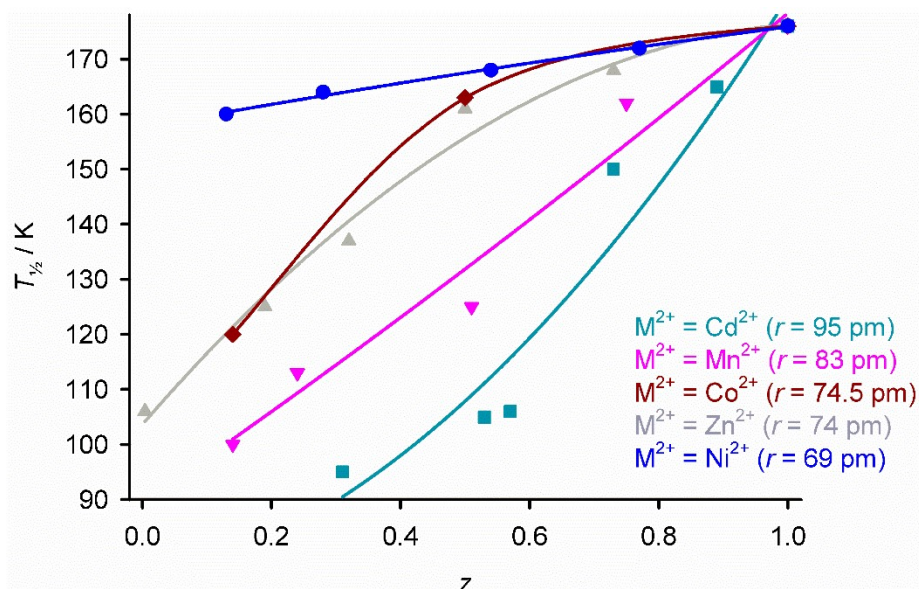

**Figure S2** Variation of  $T_{1/2}$  with composition in  $[\text{Fe}_z\text{M}_{1-z}(\text{NCS})_2(\text{phen})_2]$  (phen = 1,10-phenanthroline) with different dopant ions: M = Cd (■), Mn (▼), Zn (▲), Co (◆) and Ni (●). Data for each dopant are linked by a regression curve for clarity. Data are replotted from refs. 5-7.

Some of these literature data are more scattered than for Figure S1, but it is clear that the dopant's influence on  $T_{1/2}$  also correlates with the dopant ionic radius in this system.

**Table S1.** Molecular SCO materials containing isomorphous or non-isomorphous dopant ions, that have been used to study or manipulate SCO cooperativity, or to introduce other functionality. Other examples containing trace quantities of dopants are listed in Table S4.

| Compound <sup>a</sup>                                     | SCO $T_{1/2}$ ; form                 | Dopant | Notes                                                                                                                                                                                                  | Refs.       |
|-----------------------------------------------------------|--------------------------------------|--------|--------------------------------------------------------------------------------------------------------------------------------------------------------------------------------------------------------|-------------|
| [Fe(mtz) <sub>6</sub> ][ClO <sub>4</sub> ] <sub>2</sub>   | 66 K; gradual, 50% complete          | Zn     | The crystal contains two unique high-spin Fe environments, only one of which undergoes SCO.                                                                                                            | 8           |
|                                                           |                                      | Ni     | Fe <sub>0.35</sub> Ni <sub>0.65</sub> exhibits complete SCO with an unsymmetric hysteresis, implying a phase transition occurs below 60 K.                                                             | 9           |
| [Fe(ptz) <sub>6</sub> ][BF <sub>4</sub> ] <sub>2</sub>    | 125 or 131 K; abrupt, 7 K hysteresis | Zn     | $T_{1/2}$ depends on scan rate because of a kinetically slow phase change. The phase change does not occur with more than <i>ca</i> 70% Zn doping.                                                     | 10-14       |
|                                                           |                                      | Ru     |                                                                                                                                                                                                        | 15, 16      |
| [Fe(NCS) <sub>2</sub> (phen) <sub>2</sub> ]               | 179 K; abrupt                        | Zn     | The LIESST relaxation temperature did not vary upon Zn doping across the complete concentration range. <sup>b</sup>                                                                                    | 5-7, 17, 18 |
|                                                           |                                      | Mn     | Increased doping makes SCO progressively less complete as $T_{1/2}$ is lowered.                                                                                                                        | 5           |
|                                                           |                                      | Co     |                                                                                                                                                                                                        | 5           |
|                                                           |                                      | Ni     | The LIESST relaxation temperature decreases measurably with increased Ni doping. <sup>b</sup>                                                                                                          | 5, 7        |
|                                                           |                                      | Cd     | The LIESST relaxation temperature increases measurably with increased Cd doping, which is the opposite trend to the Ni-doped materials. <sup>b</sup>                                                   | 7           |
| [Fe(NCS) <sub>2</sub> (dppz) <sub>2</sub> ] $\cdot$ py    | 143 K; abrupt, 40 K hysteresis       | Mn     | Increased doping makes SCO progressively less complete as $T_{1/2}$ is lowered, until the material remains high-spin at 12% Mn. Intermediate compositions show TIESST on thermal cycling. <sup>c</sup> | 19          |
| [Fe(pic) <sub>3</sub> Cl <sub>2</sub> ] $\cdot$ MeOH      | 153 K; gradual                       | Zn     |                                                                                                                                                                                                        | 20          |
|                                                           |                                      | Co     |                                                                                                                                                                                                        | 20          |
| [Fe(pic) <sub>3</sub> Cl <sub>2</sub> ] $\cdot$ EtOH      | 114 and 121 K; abrupt, 2 steps       | Zn     | Stepped transition reflects an intermediate mixed-spin crystal phase that exists at 50% conversion. The intermediate phase and step are not observed with >10% Zn doping.                              | 21-27       |
|                                                           |                                      | Co     |                                                                                                                                                                                                        | 28          |
| [Fe(1-bpp) <sub>2</sub> ][BF <sub>4</sub> ] <sub>2</sub>  | 261 K; abrupt, 3 K hysteresis        | Zn     | The LIESST relaxation temperature did not vary upon Co doping within the concentration range examined (up to 23% Co). <sup>b</sup>                                                                     | 1, 29       |
|                                                           |                                      | Co     |                                                                                                                                                                                                        | 30          |
|                                                           |                                      | Ni     |                                                                                                                                                                                                        | 1, 29, 31   |
|                                                           |                                      | Ru     |                                                                                                                                                                                                        | 1           |
| [Fe(1-bpp) <sub>2</sub> ][ClO <sub>4</sub> ] <sub>2</sub> | Complex is high-spin                 | Ni     | The Fe and Ni precursor complexes are not isomorphous. The 26% Ni-doped material exhibits complete, abrupt SCO at $T_{1/2} = 251$ K.                                                                   | 32          |

**Table S1** continued.

| Compound <sup>a</sup>                                                      | SCO $T_{1/2}$ ; form                                    | Dopant         | Notes                                                                                                                                                                                                                                                                                                                                                                                                                                                                                                 | Refs.       |
|----------------------------------------------------------------------------|---------------------------------------------------------|----------------|-------------------------------------------------------------------------------------------------------------------------------------------------------------------------------------------------------------------------------------------------------------------------------------------------------------------------------------------------------------------------------------------------------------------------------------------------------------------------------------------------------|-------------|
| [Fe(1-bpp <sup>COOH</sup> ) <sub>2</sub> ][ClO <sub>4</sub> ] <sub>2</sub> | 383 K; abrupt, 3 K hysteresis                           | Co             | The Fe and Co precursor complexes are not isomorphous. The 8% Co-doped material is not an SIM at low temperatures. <sup>d</sup>                                                                                                                                                                                                                                                                                                                                                                       | 33          |
| [Fe(3-bpp) <sub>2</sub> ][BF <sub>4</sub> ] <sub>2</sub>                   | 176 K; abrupt, 10 K hysteresis                          | Mn             | Increased doping makes SCO progressively less complete as $T_{1/2}$ is lowered, until the material is almost high-spin at 15% Mn. The 10% Mn sample shows TIESST on thermal cycling. <sup>c</sup>                                                                                                                                                                                                                                                                                                     | 34, 35      |
| [Fe(3-bpp) <sub>2</sub> ][NCSe] <sub>2</sub>                               | 231 K; abrupt, 2 K hysteresis                           | Zn<br>Ni<br>Mn | The LIESST relaxation temperature increases slightly with increased Zn doping <sup>b</sup><br>The LIESST relaxation temperature decreases slightly with increased Ni doping, which is the opposite trend to the Zn-doped materials. <sup>b</sup><br>Increased doping makes SCO progressively less complete as $T_{1/2}$ is lowered, until the material remains high-spin at 80% Mn. The LIESST relaxation temperature increases slightly with increased Mn (as in the Zn-doped samples). <sup>b</sup> | 2<br>3<br>4 |
| [Fe(Me1,3-bpp) <sub>2</sub> ][ClO <sub>4</sub> ] <sub>2</sub>              | 184 K; abrupt                                           | Zn             | ≥36% Zn doping makes SCO progressively less complete as $T_{1/2}$ is lowered. Samples containing less Zn were not studied in detail.                                                                                                                                                                                                                                                                                                                                                                  | 36          |
| [Fe(qnal) <sub>2</sub> ]·CH <sub>2</sub> Cl <sub>2</sub>                   | 218 K; abrupt, 2 K hysteresis                           | Zn<br>Ni       |                                                                                                                                                                                                                                                                                                                                                                                                                                                                                                       | 37<br>37    |
| [Fe(NCS) <sub>2</sub> (bapbpy)]                                            | 183 and 237 K; abrupt, 2 steps, 22 K and 4 K hysteresis | Zn             | Stepped transition reflects a sequence of two crystallographic phase transitions during the SCO process. The step is not observed with ≥24% Zn doping.                                                                                                                                                                                                                                                                                                                                                | 38          |
| [Fe(NCBH <sub>3</sub> ) <sub>2</sub> ( <sup>2</sup> MeL)]                  | Complex is high-spin                                    | Zn<br>Ni       | The Zn-doped compound remains high-spin.<br>Doping with >50% Ni reveals an abrupt spin-transition at 72 K, which is kinetically inhibited in the undoped material.                                                                                                                                                                                                                                                                                                                                    | 39<br>39    |
| [Fe(Py <sub>2</sub> -C)][ClO <sub>4</sub> ] <sub>2</sub> ·H <sub>2</sub> O | 141 K; gradual                                          | Co             | The 60% Co-doped material is a field-induced SIM at low temperature, but did not exhibit a LIESST effect. <sup>b,d</sup>                                                                                                                                                                                                                                                                                                                                                                              | 40          |
| [Fe(CN) <sub>2</sub> (N <sub>3</sub> O <sub>2</sub> )]                     | 210 and 155 K; abrupt, ca 27 K and 10 K hysteresis      | Mn             | The pure Fe complex shows a complicated interplay between two SCO processes, reflecting a kinetically slow Fe–O bond breaking/formation step. Doping with 5% Mn almost quenches the thermal SCO by stabilising the 7-coordinate isomer.                                                                                                                                                                                                                                                               | 41          |
| [Fe({MePy} <sub>3</sub> tren)][PF <sub>6</sub> ] <sub>2</sub>              | 215 K; gradual                                          | Zn             | Zn doping has an unusually small effect on the thermal SCO.                                                                                                                                                                                                                                                                                                                                                                                                                                           | 42          |
| [Fe({MePy} <sub>3</sub> tren)][PF <sub>6</sub> ] <sub>2</sub> ·MeCN        | Not reported                                            | Zn             | A crystal containing 0.5% Fe exhibited gradual SCO at $T_{1/2}$ = 125 K.                                                                                                                                                                                                                                                                                                                                                                                                                              | 43          |

**Table S1** continued.

| Compound <sup>a</sup>                                                                                                          | SCO $T_{1/2}$ ; form                                     | Dopant   | Notes                                                                                                                                                                                                                                                                                                                                                                                                     | Refs.        |
|--------------------------------------------------------------------------------------------------------------------------------|----------------------------------------------------------|----------|-----------------------------------------------------------------------------------------------------------------------------------------------------------------------------------------------------------------------------------------------------------------------------------------------------------------------------------------------------------------------------------------------------------|--------------|
| [{Fe(NCS) <sub>2</sub> (bt)} <sub>2</sub> ( $\mu$ -bpym)]                                                                      | 197 K (gradual) and 163 K (abrupt)                       | Zn       | The dinuclear Fe complex exhibits two-step SCO <i>via</i> a discrete HS:LS intermediate state. Doping with 85% Zn converts this to a gradual transition with no intermediate step.                                                                                                                                                                                                                        | 44           |
| [Me <sub>2</sub> NH <sub>2</sub> ] <sub>6</sub> [Fe <sub>3</sub> ( $\mu$ -trzs) <sub>6</sub> (H <sub>2</sub> O) <sub>6</sub> ] | 355 K; abrupt, 90 K hysteresis                           | Zn       | The linear trinuclear Fe <sub>3</sub> complex exhibits SCO at its central Fe atom, with an exceptionally high-temperature TIESST effect. <sup>c</sup> The hysteresis and TIESST are retained upon Zn doping, showing they are a property of the individual molecules not the solid lattice.                                                                                                               | 45           |
| [Co(terpyOC <sub>16</sub> H <sub>33</sub> ) <sub>2</sub> ][BF <sub>4</sub> ] <sub>2</sub>                                      | 239 K; reverse-SCO; <sup>e</sup> abrupt, 43 K hysteresis | Zn<br>Fe | Doping with Zn stabilises the low-temperature, high-spin form of the reverse-SCO lattice <sup>e</sup> and increases $T_{1/2}$ without narrowing the hysteresis loop.<br>Doping with Fe stabilises the high-temperature, low-spin form of the reverse-SCO lattice <sup>e</sup> and lowers $T_{1/2}$ without narrowing the hysteresis loop. The 20% Fe sample shows TIESST on thermal cycling. <sup>c</sup> | 46<br>46, 47 |

<sup>a</sup>1-bpp = 2,6-*bis*{pyrazol-1-yl}pyridine; 1-bpp<sup>COOH</sup> = [2,6-*bis*{pyrazol-1-yl}pyrid-4-yl]carboxylic acid; <sup>2Me</sup>L = *N,N'*-dimethyl-*N,N'*-*bis*-{pyrid-2-ylmethyl}-1,2-diaminoethane; 3-bpp = 2,6-*bis*{1*H*-pyrazol-3-yl}pyridine; bapbpy = *N6,N6'*-di(pyridin-2-yl)-2,2'-bipyridine-6,6'-diamine; bpym = 2,2'-bi(pyrimidine); bt = 2,2'-bi(thiazoline); dppz = dipyrido[3,2-*a*:2'3'-*c*]phenazine; mtz = 1-methyltetrazole; Me1,3-bpp = 2-{3-methylpyrazol-1-yl}-6-{1*H*-pyrazol-3-yl}pyridine; {MePy}<sub>3</sub>tren = *tris*{4-(6-methylpyrid-2-yl)-3-azabuteny}amine; N<sub>3</sub>O<sub>2</sub> = 2,13-dimethyl-6,9-dioxa-3,12,18-triazabicyclo[12.3.1]-octadeca-1(18),2,12,14,16-pentaene; phen = 1,10-phenanthroline; pic = 2-(aminomethyl)pyridine; ptz = 1-*n*-propyltetrazole; py = pyridine; Py<sub>2</sub>-C = 1,8-bis(pyridin-2-ylmethyl)-1,4,8,11-tetraazacyclotetradecane; Hqnal = *N*-(quinol-8'-yl)-2-hydroxy-1-naphthaldimine; terpyOC<sub>16</sub>H<sub>33</sub> = 4'-hexadecoxy-2,2':6',2''-terpyridine; [trzs]<sup>2-</sup> = 2-(1,2,4-triazol-4-yl)ethane-1,1-disulfonate.  
<sup>b</sup>LIESST = light-induced excited spin state trapping (ref. 143). <sup>c</sup>TIESST = thermally induced excited spin state trapping (ref. 144). <sup>d</sup>SIM = single ion magnet (ref. 145). <sup>e</sup>Reverse-SCO is a low→high-spin transition on cooling (ref. 146).

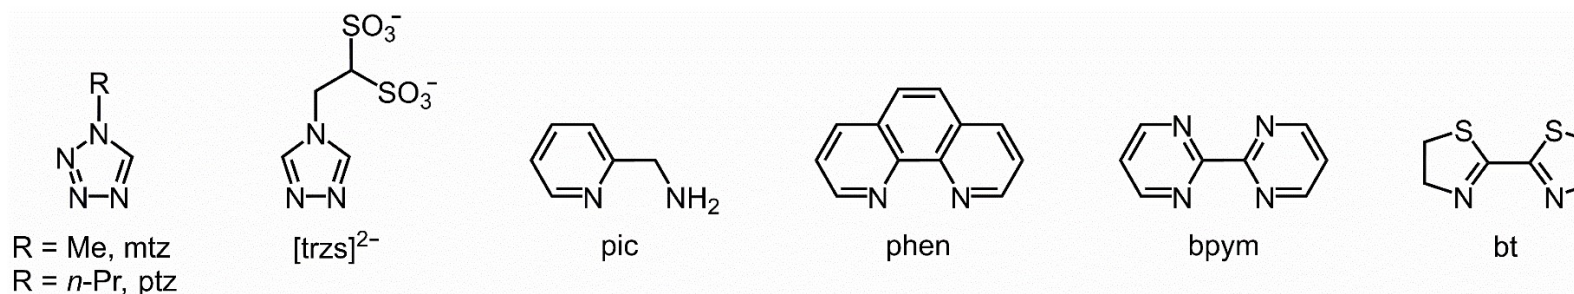

**Scheme S1.** Ligands listed in Table S1.

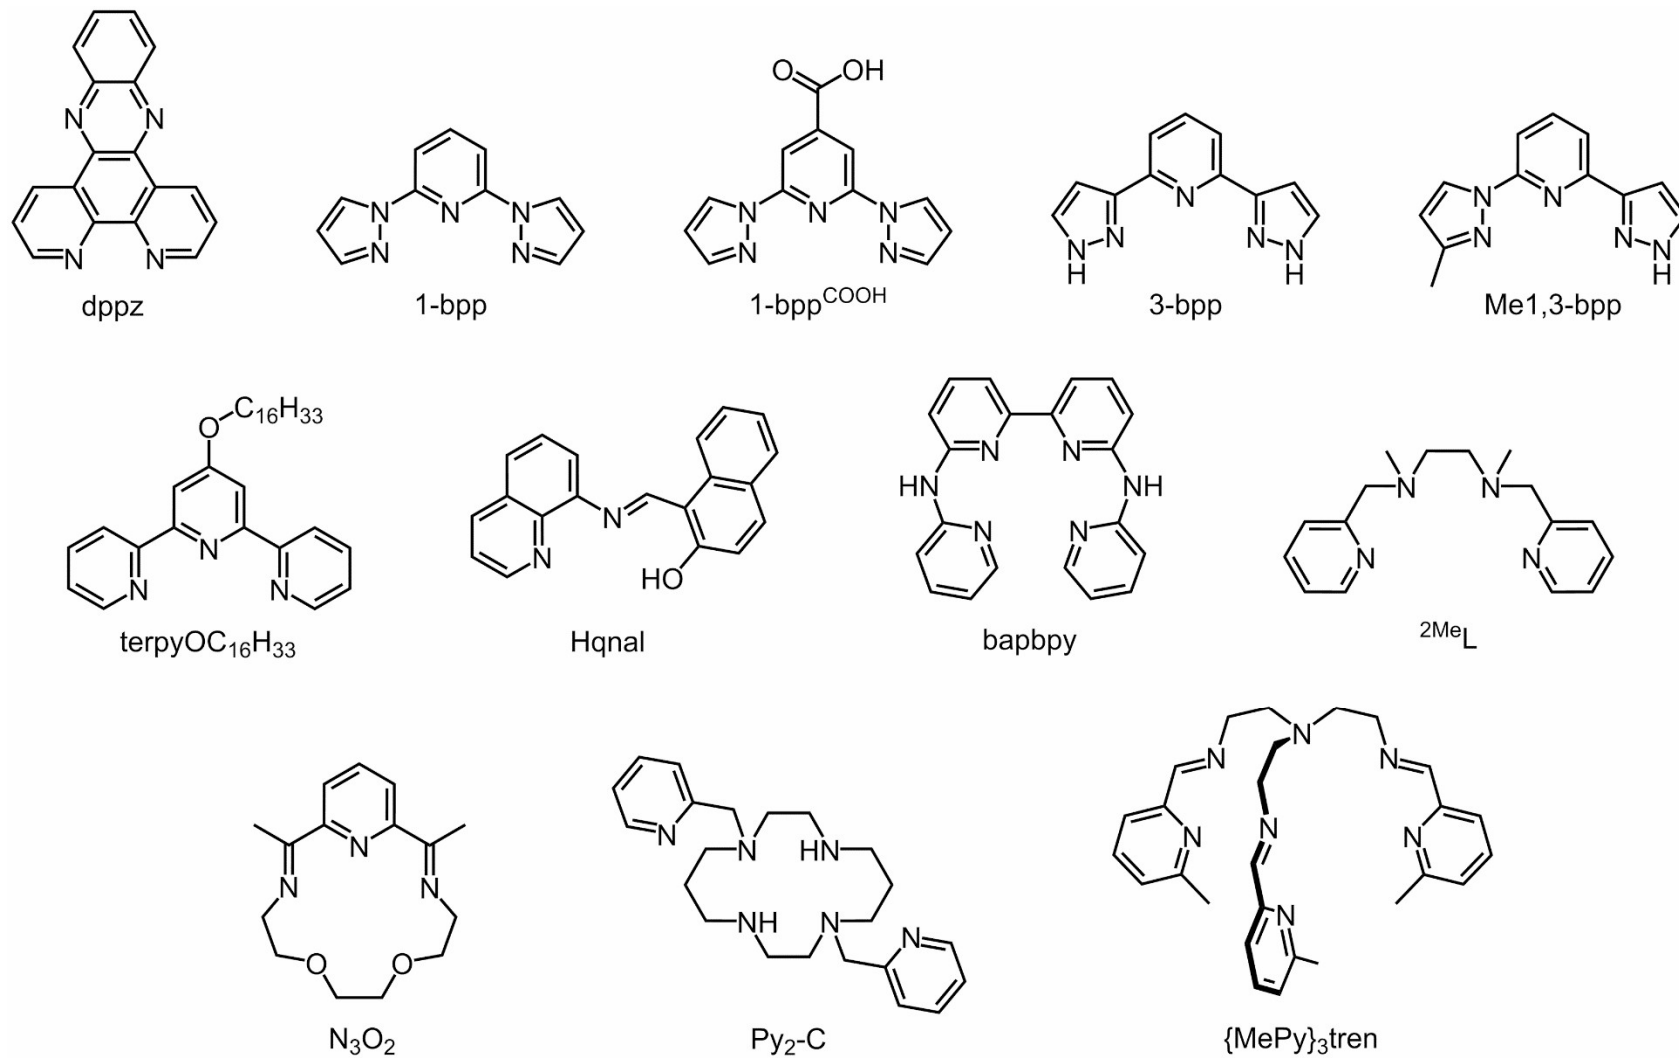

Scheme S1 continued.

**Table S2.** Coordination polymer SCO materials containing isomorphous or non-isomorphous dopants, that have been used to study or manipulate SCO cooperativity. Other examples containing trace quantities of dopants are listed in Table S4.

| Compound <sup>a</sup>                                                             | SCO $T_{1/2}$ ; form                                                | Dopant               | Notes                                                                                                                                                         | Refs.                       |
|-----------------------------------------------------------------------------------|---------------------------------------------------------------------|----------------------|---------------------------------------------------------------------------------------------------------------------------------------------------------------|-----------------------------|
| [Fe( $\mu$ -atrz) <sub>3</sub> ][NO <sub>3</sub> ] <sub>2</sub>                   | 328 K; abrupt, 37 K hysteresis                                      | Zn<br>Ni<br>Mn       | 1D coordination polymer.                                                                                                                                      | 48-53<br>53-55<br>53        |
| [Fe( $\mu$ -atrz) <sub>3</sub> ][CH <sub>3</sub> SO <sub>3</sub> ] <sub>2</sub>   | 281 K; abrupt, 15 K hysteresis                                      | Zn                   | 1D coordination polymer. A sample containing 10% Fe was used to probe the vibrational structure of this material by inelastic neutron scattering.             | 56                          |
| [Fe( $\mu$ -Htrz) <sub>3</sub> ][NO <sub>3</sub> ] <sub>2</sub> ·H <sub>2</sub> O | 350 K; abrupt, 10 K hysteresis                                      | Ni                   | 1D coordination polymer.                                                                                                                                      | 57                          |
| [Fe( $\mu$ -trz)( $\mu$ -Htrz) <sub>2</sub> ] <sub>2</sub> BF <sub>4</sub>        | 365 K; abrupt, 40 K hysteresis or<br>333 K; abrupt, 20 K hysteresis | Zn                   | 1D coordination polymer, which can be crystallised in two SCO-active polymorphs. Zn doping has been used to tune $T_{1/2}$ in nanoparticles of this material. | 58-61                       |
| [Fe( $\mu$ -endi) <sub>3</sub> ][BF <sub>4</sub> ] <sub>2</sub>                   | 143 K; gradual                                                      | Zn                   | 1D coordination polymer. The LIESST relaxation temperature increases slightly with increased Zn doping. <sup>b</sup>                                          | 62, 63                      |
| [Fe( $\mu$ -btzp) <sub>3</sub> ][BF <sub>4</sub> ] <sub>2</sub>                   | 158 K; gradual                                                      | Zn                   | 1D coordination polymer. The LIESST relaxation temperature increases slightly with increased Zn doping. <sup>b</sup>                                          | 62, 63                      |
| [Fe(NCS) <sub>2</sub> ( $\mu$ -btr) <sub>2</sub> ] <sub>2</sub> ·H <sub>2</sub> O | 134 K; abrupt, 21 K hysteresis                                      | Zn<br>Ni<br>Co       | 2D coordination polymer.                                                                                                                                      | 64-66<br>65-70<br>65, 70-72 |
| [Fe( $\mu$ -bbtr) <sub>3</sub> ][ClO <sub>4</sub> ] <sub>2</sub>                  | 105 K; abrupt, 8 K hysteresis                                       | Zn                   | 2D coordination polymer, which undergoes a phase change just above $T_{1/2}$ . Zn doping makes SCO progressively less complete as $T_{1/2}$ is lowered.       | 73-77                       |
| [Fe( $\mu$ -pyz){Pd(CN) <sub>4</sub> }]                                           | 296 K; abrupt, 12 K hysteresis                                      | Zn<br>Ni<br>Co<br>Mn | 3D porous metal-organic framework                                                                                                                             | 78<br>78<br>78<br>78        |
| [Fe( $\mu$ -pyz){Pt(CN) <sub>4</sub> }]                                           | 295 K; abrupt, 26 K hysteresis                                      | Zn<br>Ni<br>Co       | 3D porous metal-organic framework                                                                                                                             | 79<br>80<br>80              |
| [Fe( $\mu$ -pyz){Fe(CN) <sub>5</sub> (NO)}]                                       | 265 K; abrupt, 40 K hysteresis                                      | Ni<br>Co             | 3D coordination polymer.                                                                                                                                      | 81<br>81                    |

**Table S2** continued.

| Compound <sup>a</sup>                                    | SCO $T_{1/2}$ ; form            | Dopant | Notes                                                                                                                                                                                                                                                                                  | Refs. |
|----------------------------------------------------------|---------------------------------|--------|----------------------------------------------------------------------------------------------------------------------------------------------------------------------------------------------------------------------------------------------------------------------------------------|-------|
| [Fe( $\mu$ -PyCCPy){Au(CN) <sub>2</sub> } <sub>2</sub> ] | 224 K; abrupt, 5 K hysteresis   | Ni     | 3D coordination polymer. Ni doping makes the abrupt SCO more continuous (gradual), revealing colossal thermal expansion about the SCO temperature range.                                                                                                                               | 82    |
| [Fe( $\mu_3$ -ta) <sub>2</sub> ]                         | 524 K; abrupt, 117 K hysteresis | Cu     | [Fe(ta) <sub>2</sub> ] and [Cu(ta) <sub>2</sub> ] are isomorphous but can't be co-crystallised from solution. Ball milling mechanical mixtures of [Fe(ta) <sub>2</sub> ] and [Cu(ta) <sub>2</sub> ] yielded a homogeneous solid solution material, but whose SCO was not investigated. | 83    |

<sup>a</sup>atrz = 4-amino-1,2,4-triazole; bbtr = 1,4-bis(1,2,3-triazol-1-yl)butane; btr = 4,4'-bi(1,2,4-triazole); btzp = 1,2-bis({tetrazol-1-yl})propane; endi = 1,2-bis({tetrazol-1-yl})ethane; PyCCPy = bis(pyrid-4-yl)ethyne; pyz = pyrazine; Hta = 1*H*-1,2,2-triazole; Htrz = 4*H*-1,2,4-triazole. <sup>b</sup>LIESST = light-induced excited spin state trapping (ref. 143).

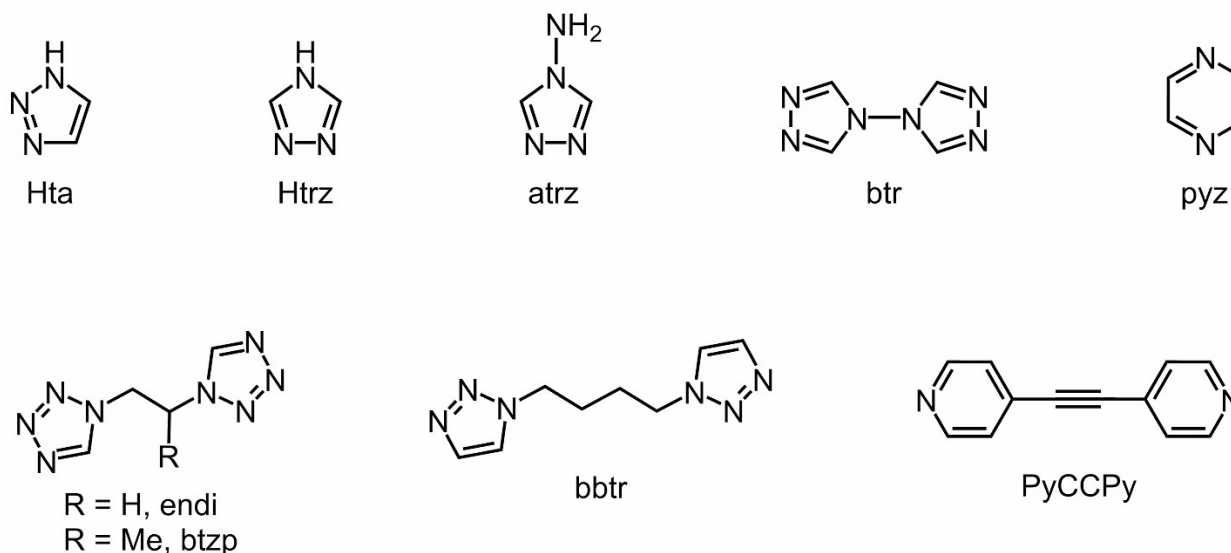

**Scheme S2.** Ligands listed in Table S2.



**Table S3.** Highly dilute solid solutions of iron(II) complexes in inert host crystals, used to study the photophysics of isolated molecules in the solid state.

| Compound <sup>a</sup>                                    | SCO $T_{1/2}$ ; form                 | Host lattice metal ion | Notes                                                                                                                                                                                                       | Refs.  |
|----------------------------------------------------------|--------------------------------------|------------------------|-------------------------------------------------------------------------------------------------------------------------------------------------------------------------------------------------------------|--------|
| [Fe(ptz) <sub>6</sub> ][BF <sub>4</sub> ] <sub>2</sub>   | 125 or 131 K; abrupt, 7 K hysteresis | Zn                     | $T_{1/2}$ depends on scan rate because of a kinetically slow phase change. Crystals containing $\geq 0.5\%$ Fe were used to probe isolated iron sites in the lattice.                                       | 12     |
| [Fe(bipy) <sub>3</sub> ][ClO <sub>4</sub> ] <sub>2</sub> | Complex is low-spin                  | Zn                     | Crystals containing 0.5% Fe were still low-spin, and were used to probe the photophysics of isolated iron sites in the lattice.                                                                             | 84     |
|                                                          |                                      | Ni                     | Crystals containing 0.5% Fe were still low-spin, and were used to probe the photophysics of isolated iron sites in the lattice.                                                                             | 84     |
|                                                          |                                      | Mn                     | Crystals containing 0.5% Fe were still low-spin, and were used to probe the photophysics of isolated iron sites in the lattice.                                                                             | 84     |
| [Fe(bipy) <sub>3</sub> ][PF <sub>6</sub> ] <sub>2</sub>  | Complex is low-spin                  | Zn                     | Crystals containing 0.01-1% Fe were still low-spin, and were used to probe the photophysics of isolated iron sites in the lattice.                                                                          | 85-87  |
|                                                          |                                      | Mn                     | Crystals containing 0.01-1% Fe were still low-spin, and were used to probe the photophysics of isolated iron sites in the lattice.                                                                          | 86, 87 |
|                                                          |                                      | Co                     | Highly dilute crystals were still low-spin, and were used to probe the photophysics of isolated iron sites in the lattice.                                                                                  | 87     |
|                                                          |                                      | Cd                     | Crystals containing 0.01-1% Fe were still low-spin, and were used to probe the photophysics of isolated iron sites in the lattice.                                                                          | 86, 87 |
| [Fe(phen) <sub>3</sub> ][ClO <sub>4</sub> ] <sub>2</sub> | Complex is low-spin                  | Zn                     | Crystals containing 0.5% Fe were still low-spin, and were used to probe the photophysics of isolated iron sites in the lattice.                                                                             | 84     |
|                                                          |                                      | Ni                     | Crystals containing 0.5% Fe were still low-spin, and were used to probe the photophysics of isolated iron sites in the lattice.                                                                             | 84     |
|                                                          |                                      | Mn                     | Crystals containing 0.5% Fe were still low-spin, and were used to probe the photophysics of isolated iron sites in the lattice.                                                                             | 84     |
| [Fe(pic) <sub>3</sub> ] <sub>2</sub> ·MeOH               | 153 K; gradual                       | Zn                     | Crystals containing 0.05% Fe were used to probe the photophysics of isolated iron sites in the lattice.                                                                                                     | 88     |
|                                                          |                                      | Mn                     | Crystals containing 0.05% Fe were used to probe the photophysics of isolated iron sites in the lattice.                                                                                                     | 88     |
| [Fe(pic) <sub>3</sub> ] <sub>2</sub> ·EtOH               | 114 and 121 K; abrupt, 2 steps       | Zn                     | Stepped transition reflects an intermediate mixed-spin crystal phase that exists at 50% conversion. Crystals containing 0.05% Fe were used to probe the photophysics of isolated iron sites in the lattice. | 88     |
|                                                          |                                      | Mn                     | Crystals containing 0.05% Fe were used to probe the photophysics of isolated iron sites in the lattice.                                                                                                     | 88     |

**Table S3** continued.

| Compound <sup>a</sup>                                               | SCO $T_{1/2}$ ; form          | Host lattice metal ion | Notes                                                                                                                                                                                                                      | Refs.  |
|---------------------------------------------------------------------|-------------------------------|------------------------|----------------------------------------------------------------------------------------------------------------------------------------------------------------------------------------------------------------------------|--------|
| [Fe(terpy) <sub>2</sub> ][ClO <sub>4</sub> ] <sub>2</sub>           | Complex is low-spin           | Mn                     | A sample containing 2% Fe was still low-spin but exhibited a LIESST effect, which is not shown by the pure Fe complex. <sup>b</sup>                                                                                        | 89     |
| [Fe({MePy} <sub>3</sub> tren)][PF <sub>6</sub> ] <sub>2</sub>       | 215 K; gradual                | Zn                     | Crystals containing 0.31 and 0.05% Fe were used to probe the photophysics of isolated iron sites in the lattice.                                                                                                           | 42, 90 |
| [Fe({MePy} <sub>3</sub> tren)][PF <sub>6</sub> ] <sub>2</sub> ·MeCN | Not reported                  | Zn                     | A crystal containing 0.5% Fe was used to probe the photophysics of isolated iron sites in the lattice.                                                                                                                     | 43     |
| [Fe( $\mu$ -bbtr) <sub>3</sub> ][ClO <sub>4</sub> ] <sub>2</sub>    | 105 K; abrupt, 8 K hysteresis | Zn                     | 2D coordination polymer, which undergoes a phase change just above $T_{1/2}$ . Samples containing 2-10% Fe remain high-spin on cooling, and were used to probe the photophysics of isolated iron sites in a solid lattice. | 91, 92 |

<sup>a</sup>bipy = 2,2'-bipyridine; bbtr = 1,4-bis(1,2,3-triazol-1-yl)butane; {MePy}<sub>3</sub>tren = *tris*{4-(6-methylpyrid-2-yl)-3-azabutanyl} amine; phen = 1,10-phenanthroline; pic = 2-(aminomethyl)pyridine; ptz = 1-*n*-propyltetrazole; terpy = 2,2':6',6''-terpyridine. <sup>b</sup>LIESST = light-induced excited spin state trapping (ref. 143).

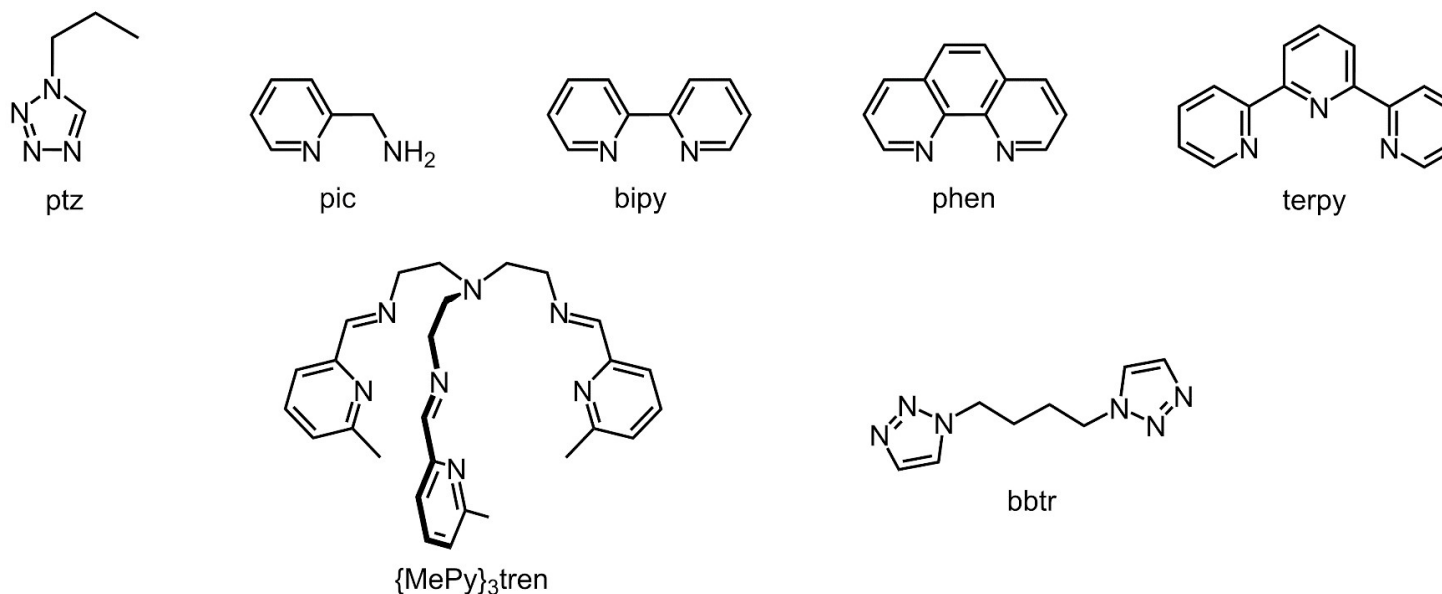

**Scheme S3.** Ligands listed in Table S3.

**Table S4.** SCO materials containing trace paramagnetic dopant ions, that have been used to probe SCO by EPR spectroscopy.

| Compound <sup>a</sup>                                                                      | SCO $T_{1/2}$ ; form                                  | Dopant | Notes                                                                                                                                                                                                                                                                      | Refs.    |
|--------------------------------------------------------------------------------------------|-------------------------------------------------------|--------|----------------------------------------------------------------------------------------------------------------------------------------------------------------------------------------------------------------------------------------------------------------------------|----------|
| [Fe(ptz) <sub>6</sub> ][BF <sub>4</sub> ] <sub>2</sub>                                     | 125 or 131 K; abrupt,<br>7 K hysteresis               | Mn     | 1-2% Mn dopant used as an EPR probe of the iron spin state during thermal SCO.<br>Distinguished the two different low-spin phases accessible in the low-spin state (Table S1).                                                                                             | 93       |
|                                                                                            |                                                       | Cu     | 1-2% Cu dopant used as an EPR probe of the iron spin state during thermal SCO.<br>Distinguished the two different low-spin phases accessible in the low-spin state (Table S1).                                                                                             | 93       |
| [Fe(NCS) <sub>2</sub> (phen) <sub>2</sub> ]                                                | 179 K; abrupt                                         | Mn     | 1% Mn dopant used as an EPR probe of the iron spin state during thermal SCO.                                                                                                                                                                                               | 94       |
| [Fe(NCS) <sub>2</sub> (PM-BiA) <sub>2</sub> ]                                              | 225 K; abrupt, 60 K hysteresis                        | Mn     | A naturally occurring Mn impurity in the native iron complex was used as an EPR probe of the iron spin state during thermal SCO.                                                                                                                                           | 95       |
| $\alpha$ -[Fe(NCS) <sub>2</sub> (bt) <sub>2</sub> ]                                        | 177 K; abrupt, 10 K hysteresis                        | Mn     | Complex also forms a second $\beta$ -polymorph, which is high-spin. <5% Mn dopant used as an EPR probe of the iron spin state during thermal SCO in the $\alpha$ -phase.                                                                                                   | 96       |
| [Fe(tcnq) <sub>2</sub> (abpt) <sub>2</sub> ]                                               | 280 K; gradual                                        | Mn     | Trace Mn dopant used as an EPR probe of the iron spin state during thermal SCO.                                                                                                                                                                                            | 97       |
|                                                                                            |                                                       | Cu     | Trace Cu dopant used as an EPR probe of the iron spin state during thermal SCO.                                                                                                                                                                                            | 97       |
| [Fe(pic) <sub>3</sub> ]Cl <sub>2</sub> ·EtOH                                               | 114 and 121 K; abrupt, 2 steps                        | Mn     | 1% Mn dopant used as an EPR probe of the iron spin state during thermal SCO. The SCO transition domains observed in ref. 98 may refer to the mixed-spin intermediate phase that was subsequently discovered ( <i>Angew. Chem. Int. Ed.</i> , 2003, <b>42</b> , 3825–3830). | 94, 98   |
|                                                                                            |                                                       | Co     | Co dopant used as an EPR probe of the iron spin state in the LIESST experiment. <sup>b</sup>                                                                                                                                                                               | 99       |
| [Fe(1-bpp) <sub>2</sub> ][BF <sub>4</sub> ] <sub>2</sub>                                   | 261 K; abrupt, 3 K hysteresis                         | Cu     | 3% Cu dopant used as an EPR probe of the iron spin state in the LIESST experiment, <sup>b</sup> and to probe the Jahn-Teller properties of the Cu dopant in the Fe host lattice.                                                                                           | 100, 101 |
| [Fe(3-bpp) <sub>2</sub> ][BF <sub>4</sub> ] <sub>2</sub>                                   | 176 K; abrupt, 10 K hysteresis                        | Mn     | 3% Mn dopant used as an EPR probe of the iron spin state during thermal SCO.<br>Demonstrated the involvement of a crystallographic phase change during the transition.                                                                                                     | 102      |
| [Fe(3-bpp) <sub>2</sub> ][CF <sub>3</sub> SO <sub>3</sub> ] <sub>2</sub> ·H <sub>2</sub> O | 215 K; abrupt, unsymmetrical<br>140 K hysteresis loop | Mn     | 3% Mn dopant used as an EPR probe of the iron spin state during thermal SCO.<br>Demonstrated the involvement of a crystallographic phase change during the transition.                                                                                                     | 102      |
| [Fe(Me <sub>2</sub> 3-bpp) <sub>2</sub> ][BF <sub>4</sub> ] <sub>2</sub>                   | 205 K; abrupt, 65 K hysteresis                        | Cu     | 3% Cu dopant used as an EPR probe of the iron spin state during thermal SCO.<br>Demonstrated the involvement of a symmetry-breaking phase change during the transition.                                                                                                    | 103      |
| [Fe(NCS) <sub>2</sub> ( $\mu$ -btr) <sub>2</sub> ] <sub>2</sub> ·H <sub>2</sub> O          | 134 K; abrupt, 21 K hysteresis                        | Mn     | 2D coordination polymer. 5% Mn dopant used as an EPR probe of the iron spin state during thermal SCO.                                                                                                                                                                      | 104      |
|                                                                                            |                                                       | Cu     | 1-5% Cu dopant used as an EPR probe of the iron spin state during thermal SCO.                                                                                                                                                                                             | 104, 105 |

**Table S4** continued.

| Compound <sup>a</sup>                                                        | SCO $T_{1/2}$ ; form          | Dopant | Notes                                                                                                 | Refs. |
|------------------------------------------------------------------------------|-------------------------------|--------|-------------------------------------------------------------------------------------------------------|-------|
| [Fe(NCSe) <sub>2</sub> ( $\mu$ -btr) <sub>2</sub> ] $\cdot$ H <sub>2</sub> O | 214 K; abrupt, 7 K hysteresis | Mn     | 2D coordination polymer. 5% Mn dopant used as an EPR probe of the iron spin state during thermal SCO. | 104   |
|                                                                              |                               | Cu     | 5% Cu dopant used as an EPR probe of the iron spin state during thermal SCO.                          | 104   |

<sup>a</sup>1-bpp = 2,6-*bis*{pyrazol-1-yl}pyridine; 3-bpp = 2,6-*bis*{1*H*-pyrazol-3-yl}pyridine; abpt = 4-amino-3,5-*bis*(pyrid-2-yl)-1,2,4-triazole; bt = 2,2'-bi(thiazoline); btr = 4,4'-bi(1,2,4-triazole); Me<sub>2</sub>3-bpp = 2,6-*bis*{5-methyl-1*H*-pyrazol-3-yl}pyridine; ptz = 1-*n*-propyltetrazole; phen = 1,10-phenanthroline; pic = 2-(aminomethyl)pyridine; PM-BiA = *N*-(2-pyridinylmethylene)[1,1'-biphenyl]-4-amine; [tcnq]<sup>-</sup> = 7,7',8,8'-tetracyanoquinodimethanide. <sup>b</sup>LIESST = light-induced excited spin state trapping (ref. 143).

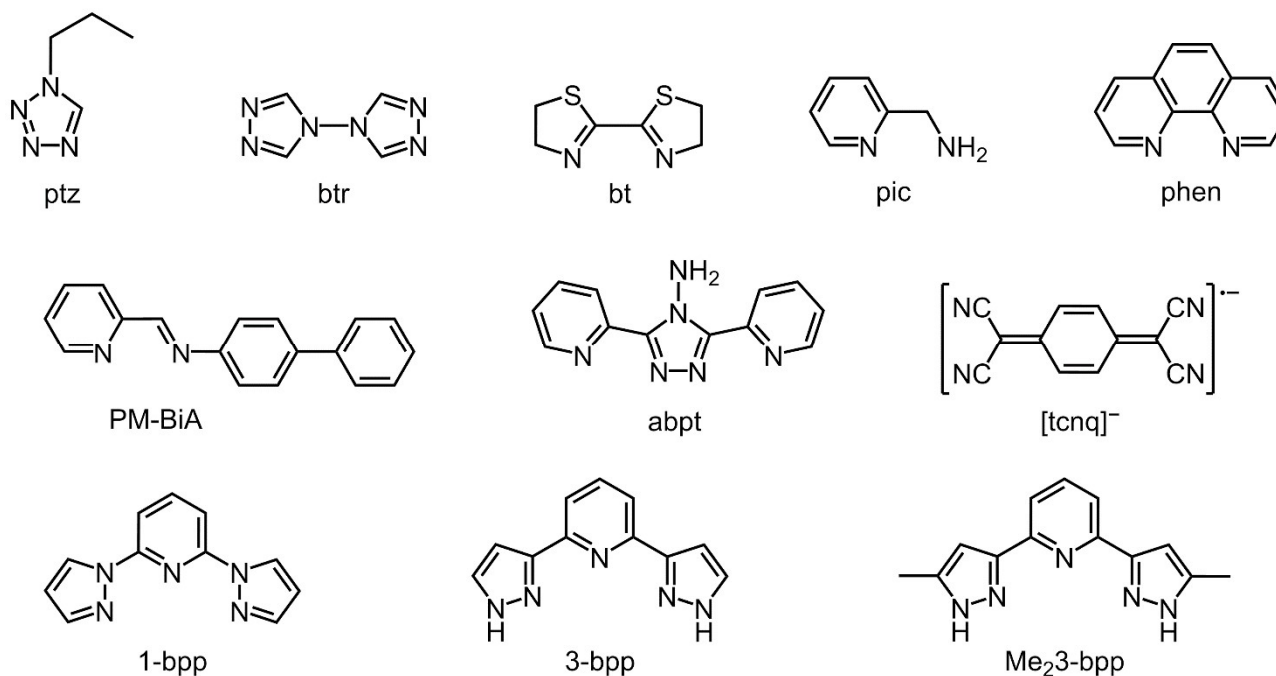

**Scheme S4.** Ligands listed in Table S4.

**Table S5.** Non-stoichiometric mixed-anion salts of SCO complexes,  $[\text{FeL}_n]\text{X}_{2z}\text{Y}_{2-2z}$  ( $\text{X}^-$ ,  $\text{Y}^-$  = anion).

| Precursor compounds <sup>a</sup>                                                                                                                              | SCO $T_{1/2}$ ; form                                                       | Are the precursor salts isomorphous? | Notes                                                                                                                                                                                                                                                                                                                                                                                                                                                                 | Refs.    |
|---------------------------------------------------------------------------------------------------------------------------------------------------------------|----------------------------------------------------------------------------|--------------------------------------|-----------------------------------------------------------------------------------------------------------------------------------------------------------------------------------------------------------------------------------------------------------------------------------------------------------------------------------------------------------------------------------------------------------------------------------------------------------------------|----------|
| $[\text{Fe}(\text{Hpt})_3][\text{BF}_4]_2 \cdot 2\text{H}_2\text{O}$<br>$[\text{Fe}(\text{Hpt})_3]\text{SO}_4 \cdot 3\text{H}_2\text{O}$                      | 135 K; gradual, incomplete<br><i>ca</i> 100 K; gradual, incomplete         | Not known                            | $[\text{Fe}(\text{Hpt})_3][\text{BF}_4]_{1.2}[\text{SO}_4]_{0.4} \cdot 3\text{H}_2\text{O}$ exhibits gradual SCO with $T_{1/2} = 170$ K, to full completeness at low temperature.                                                                                                                                                                                                                                                                                     | 106      |
| $[\text{Fe}(1\text{-bpp})_2][\text{BF}_4]_2$<br>$[\text{Fe}(1\text{-bpp})_2][\text{ClO}_4]_2$                                                                 | 261 K; abrupt, 3 K hysteresis<br>High-spin                                 | No                                   | $[\text{Fe}(1\text{-bpp})_2][\text{BF}_4]_{2z}[\text{ClO}_4]_{2-2z}$ with $z \geq 0.5$ are fully SCO-active, with $T_{1/2}$ decreasing slightly as $z$ decreases. The salt with $z = 0.16$ is a mixture of phases, and exhibits 75 %-complete SCO as a rapidly precipitate powder. The LIESST relaxation temperature is identical for all compositions. <sup>b</sup>                                                                                                  | 107      |
| $[\text{Fe}(1\text{-bpp}^{\text{NHAc}})_2][\text{BF}_4]_2 \cdot \text{EtCN}$<br>$[\text{Fe}(1\text{-bpp}^{\text{NHAc}})_2][\text{ClO}_4]_2 \cdot \text{EtCN}$ | 181 and 192 K; abrupt<br>151 and 183 K; abrupt,<br>5 K and 11 K hysteresis | Yes                                  | Stepped transition reflects a re-entrant mixed-spin crystal phase that exists at 50% conversion. $[\text{Fe}(1\text{-bpp}^{\text{NHAc}})_2][\text{BF}_4]_{2z}[\text{ClO}_4]_{2-2z} \cdot \text{EtCN}$ ( $z \approx 0.5$ ) exhibits the same two-step transition, with $T_{1/2}$ and hysteresis widths intermediate between the pure $\text{BF}_4^-$ and $\text{ClO}_4^-$ salts.                                                                                       | 108      |
| $[\text{Fe}(\text{Me}_2\text{3-bpp})_2][\text{BF}_4]_2$<br>$[\text{Fe}(\text{Me}_2\text{3-bpp})_2][\text{ClO}_4]_2$                                           | 205 K; abrupt, 65 K hysteresis<br>High-spin                                | Yes                                  | SCO in the $\text{BF}_4^-$ salt involves a series of phase changes, which become kinetically slower in $[\text{Fe}(\text{Me}_2\text{3-bpp})_2][\text{BF}_4]_{2z}[\text{ClO}_4]_{2-2z}$ as $z$ increases up to 0.5. Hence the absence of SCO in the $\text{ClO}_4^-$ salt is a kinetic effect.                                                                                                                                                                         | 109      |
| $[\text{Fe}(\mu\text{-atrz})_3][\text{BF}_4]_2$<br>$[\text{Fe}(\mu\text{-atrz})_3]\text{SiF}_6$                                                               | 235 K; gradual, 10 K hysteresis<br>248 K; gradual, 14 K hysteresis         | Not known                            | 1D coordination polymer. Various SCO behaviours were observed for different $[\text{Fe}(\mu\text{-atrz})_3][\text{BF}_4]_{2z}[\text{SiF}_6]_{1-z}$ compositions, with $T_{1/2} = 310 \pm 10$ K in most samples.                                                                                                                                                                                                                                                       | 110, 111 |
| $[\text{Fe}(\mu\text{-bbtr})_3][\text{BF}_4]_2$<br>$[\text{Fe}(\mu\text{-bbtr})_3][\text{ClO}_4]_2$                                                           | 83 K; abrupt, 13 K hysteresis<br>105 K; abrupt, 8 K hysteresis             | Yes (at room temperature)            | 2D coordination polymer. The $\text{ClO}_4^-$ salt undergoes a phase change above $T_{1/2}$ but the $\text{BF}_4^-$ salt does not. SCO in the $\text{BF}_4^-$ salt is kinetically slow. The slow kinetics are retained in $[\text{Fe}(\mu\text{-bbtr})_3][\text{BF}_4]_{2z}[\text{ClO}_4]_{2-2z}$ for $z \geq 0.56$ , but not in more perchlorate-rich salts. The midpoint pressure of SCO at room temperature ( $P_{1/2}$ ) varies approximately linearly with $z$ . | 112      |

<sup>a</sup>1-bpp = 2,6-bis{pyrazol-1-yl}pyridine; 1-bpp<sup>NHAc</sup> = N-(2,6-di{pyrazol-1-yl}pyrid-4-yl)acetamide; atrz = 4-amino-1,2,4-triazole; bbtr = 1,4-bis(1,2,3-triazol-1-yl)butane; Me<sub>2</sub>3-bpp = 2,6-bis{5-methyl-1H-pyrazol-3-yl}pyridine; Hpt = 3-(pyrid-2-yl)-1H-1,2,4-triazole. <sup>b</sup>LIESST = light-induced excited spin state trapping (ref. 143).

Examples of double salts of SCO complexes with stoichiometric anion compositions,  $[\text{FeL}_n]\text{XY}$ , are described in refs. 113-123.

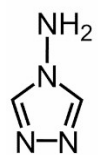

atrz

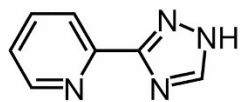

Hpt

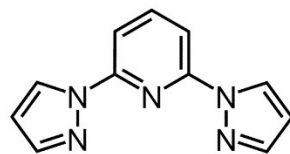

1-bpp

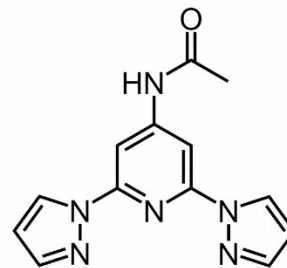

1-bpp<sup>NHAc</sup>

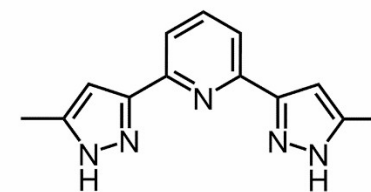

Me<sub>2</sub>-3-bpp

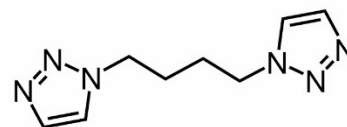

bbtr

**Scheme S5.** Ligands listed in Table S5.

**Table S6.** Molecular alloys of SCO materials, that have been characterised with non-stoichiometric compositions.

| Precursor compounds <sup>a</sup>                                                                                                                                         | SCO $T_{1/2}$ ; form                                                  | Are the precursors isomorphous? | Notes                                                                                                                                                                                                                                                                                                                                         | Refs.   |
|--------------------------------------------------------------------------------------------------------------------------------------------------------------------------|-----------------------------------------------------------------------|---------------------------------|-----------------------------------------------------------------------------------------------------------------------------------------------------------------------------------------------------------------------------------------------------------------------------------------------------------------------------------------------|---------|
| [Fe( $\mu$ -atrz) <sub>3</sub> ][ClO <sub>4</sub> ] <sub>2</sub> ·H <sub>2</sub> O<br>[Fe( $\mu$ -Htrz) <sub>3</sub> ][ClO <sub>4</sub> ] <sub>2</sub> ·H <sub>2</sub> O | 188 K; abrupt, 2 K hysteresis<br>311 K; abrupt, 15 K hysteresis       | Not known                       | Bulk samples of [Fe( $\mu$ -atrz) <sub>3n</sub> ( $\mu$ -Htrz) <sub>3-3n</sub> ][ClO <sub>4</sub> ] <sub>2</sub> ·H <sub>2</sub> O give abrupt, hysteretic SCO with $T_{1/2}$ and hysteresis width varying linearly for $0 < n < 1$ . Nanoparticles of this system follow a similar trend.                                                    | 124-126 |
| [Fe( $\mu$ -atrz) <sub>3</sub> ][NO <sub>3</sub> ] <sub>2</sub><br>[Fe( $\mu$ -Htrz) <sub>3</sub> ][NO <sub>3</sub> ] <sub>2</sub>                                       | 329 K; abrupt, 31 K hysteresis<br><i>ca</i> 370 K; abrupt, hysteresis | Not known                       | SCO in [Fe( $\mu$ -atrz) <sub>3n</sub> ( $\mu$ -Htrz) <sub>3-3n</sub> ][NO <sub>3</sub> ] <sub>2</sub> ·H <sub>2</sub> O with $0 < n < 1$ becomes more abrupt as $n$ decreases.                                                                                                                                                               | 127     |
| [Fe( $\mu$ -atrz) <sub>3</sub> SiF <sub>6</sub> ·H <sub>2</sub> O<br>[Fe( $\mu$ -Htrz) <sub>3</sub> SiF <sub>6</sub> ·2H <sub>2</sub> O                                  | 248 K; gradual, 14 K hysteresis<br>404 K; gradual, irreversible       | Not known                       | [Fe( $\mu$ -atrz) <sub>3n</sub> ( $\mu$ -Htrz) <sub>3-3n</sub> SiF <sub>6</sub> ·H <sub>2</sub> O exhibit gradual SCO, with a linear dependence of $T_{1/2}$ on composition for $0 < n < 1$ .                                                                                                                                                 | 128     |
| [Fe( $\mu$ -atrz) <sub>3</sub> ][BF <sub>4</sub> ] <sub>2</sub> ·H <sub>2</sub> O<br>[Fe( $\mu$ -trz)( $\mu$ -Htrz) <sub>2</sub> ][BF <sub>4</sub> ] <sub>2</sub>        | 255 K; abrupt, 10 K hysteresis<br>355 K; abrupt, 40 K hysteresis      | No                              | [Fe( $\mu$ -Htrz) <sub>1+n-m</sub> ( $\mu$ -trz) <sub>2-n</sub> ( $\mu$ -atrz) <sub>m</sub> ][BF <sub>4</sub> ] <sub>n</sub> ·xH <sub>2</sub> O nanoparticle polymer composites show abrupt hysteretic SCO for $0 < m < 0.3$ , with $T_{1/2}$ decreasing as $m$ increases. SCO induces a strong piezoelectric response.                       | 129-132 |
| [Fe( $\mu$ -atrz) <sub>3</sub> ][NO <sub>3</sub> ] <sub>2</sub><br>[Fe( $\mu$ -An-atrz) <sub>3</sub> ][NO <sub>3</sub> ] <sub>2</sub>                                    | 329 K; abrupt, 31 K hysteresis<br>287 K; gradual                      | No                              | Alloys produced by treating [Fe( $\mu$ -atrz) <sub>3</sub> ][NO <sub>3</sub> ] <sub>2</sub> with 4-anisylaldehyde. Intermediate compositions of [Fe( $\mu$ -atrz) <sub>3n</sub> ( $\mu$ -An-atrz) <sub>3-3n</sub> ][NO <sub>3</sub> ] <sub>2</sub> exhibit SCO in discrete steps, from unreacted and reacted regions of the sample.           | 133     |
| [Fe( $\mu$ -atrz) <sub>3</sub> ][ClO <sub>4</sub> ] <sub>2</sub> ·H <sub>2</sub> O<br>[Fe( $\mu$ -PCA-atrz) <sub>3</sub> ][ClO <sub>4</sub> ] <sub>2</sub>               | 329 K; abrupt, 31 K hysteresis<br>Not known                           | Not known                       | [Fe( $\mu$ -atrz) <sub>3n</sub> ( $\mu$ -PCA-atrz) <sub>3-3n</sub> ][ClO <sub>4</sub> ] <sub>2</sub> ( $n = 0.15$ ) produced by reacting [Fe( $\mu$ -atrz) <sub>3</sub> ][ClO <sub>4</sub> ] <sub>2</sub> and 1-pyrenecarboxaldehyde. It shows gradual SCO at 225 K with 10 K hysteresis, and spin state-dependent fluorescence.              | 134     |
| [Fe( $\mu$ -atrz) <sub>3</sub> ][ClO <sub>4</sub> ] <sub>2</sub> ·H <sub>2</sub> O<br>[Fe( $\mu$ -RhB-atrz) <sub>3</sub> ][ClO <sub>4</sub> ] <sub>2</sub>               | 329 K; abrupt, 31 K hysteresis<br>Not known                           | Not known                       | [Fe( $\mu$ -atrz) <sub>3n</sub> ( $\mu$ -RhB-atrz) <sub>3-3n</sub> ][ClO <sub>4</sub> ] <sub>2</sub> ( $n = 0.10$ ) produced by reacting [Fe( $\mu$ -atrz) <sub>3</sub> ][ClO <sub>4</sub> ] <sub>2</sub> and rhodamine B. It shows gradual SCO at 258 K with 11 K thermal hysteresis, and spin state-dependent fluorescence.                 | 134     |
| [Fe( $\mu$ -atrz) <sub>3</sub> ][ClO <sub>4</sub> ] <sub>2</sub> ·H <sub>2</sub> O<br>[Fe( $\mu$ -ANTH-atrz) <sub>3</sub> ][ClO <sub>4</sub> ] <sub>2</sub>              | 329 K; abrupt, 31 K hysteresis<br>Not known                           | Not known                       | [Fe( $\mu$ -atrz) <sub>3n</sub> ( $\mu$ -ANTH-atrz) <sub>3-3n</sub> ][ClO <sub>4</sub> ] <sub>2</sub> ( $n = 0.13$ ) produced by reacting [Fe( $\mu$ -atrz) <sub>3</sub> ][ClO <sub>4</sub> ] <sub>2</sub> with 9-anthraldehyde. It shows gradual SCO at 255 K with 2 K thermal hysteresis, and spin state-dependent fluorescence.            | 135     |
| [Fe( $\mu$ -atrz) <sub>3</sub> ][ClO <sub>4</sub> ] <sub>2</sub> ·H <sub>2</sub> O<br>[Fe( $\mu$ -PD-atrz) <sub>3</sub> ][ClO <sub>4</sub> ] <sub>2</sub>                | 329 K; abrupt, 31 K hysteresis<br>Not known                           | Not known                       | [Fe( $\mu$ -atrz) <sub>3n</sub> ( $\mu$ -PD-atrz) <sub>3-3n</sub> ][ClO <sub>4</sub> ] <sub>2</sub> ( $n = 0.10$ ) produced by reacting [Fe( $\mu$ -atrz) <sub>3</sub> ][ClO <sub>4</sub> ] <sub>2</sub> with 9-phenanthrenecarboxaldehyde. It shows gradual SCO at 255 K with 2 K thermal hysteresis, and spin state-dependent fluorescence. | 135     |

**Table S6** continued.

| Precursor compounds <sup>a</sup>                                                                                                                                                                     | SCO $T_{1/2}$ ; form                                             | Are the precursors isomorphous? | Notes                                                                                                                                                                                                                                                                                                                                                                               | Refs. |
|------------------------------------------------------------------------------------------------------------------------------------------------------------------------------------------------------|------------------------------------------------------------------|---------------------------------|-------------------------------------------------------------------------------------------------------------------------------------------------------------------------------------------------------------------------------------------------------------------------------------------------------------------------------------------------------------------------------------|-------|
| [Fe( $\mu$ -pyz){Pd(CN) <sub>4</sub> }]<br>[Fe( $\mu$ -pyz <sup>NH<sub>2</sub>)}{Pd(CN)<sub>4</sub>}]</sup>                                                                                          | 296 K; abrupt, 12 K hysteresis<br>High-spin                      | No                              | SCO in [Fe( $\mu$ -pyz) <sub>n</sub> ( $\mu$ -pyz <sup>NH<sub>2</sub>)<sub>1-n</sub>]{Pd(CN)<sub>4</sub>} has lower <math>T_{1/2}</math> as <math>n</math> decreases, in the range <math>0.3 &lt; n &lt; 1</math>. The transition also becomes increasingly gradual, with narrower hysteresis, for lower values of <math>n</math>.</sup>                                            | 136   |
| [Fe( $\mu$ -pyz){Pt(CN) <sub>4</sub> }]<br>[Fe( $\mu$ -pyz <sup>NH<sub>2</sub>)}{Pt(CN)<sub>4</sub>}]</sup>                                                                                          | 295 K; abrupt, 26 K hysteresis<br>High-spin                      | No                              | SCO in [Fe( $\mu$ -pyz) <sub>n</sub> ( $\mu$ -pyz <sup>NH<sub>2</sub>)<sub>1-n</sub>]{Pt(CN)<sub>4</sub>} shows lower <math>T_{1/2}</math> and narrower hysteresis as <math>n</math> decreases, for <math>0.6 &lt; n &lt; 1</math>. The relationship between <math>T_{1/2}</math> vs. composition is approximately linear. Alloys with <math>n \leq 0.5</math> are high-spin.</sup> | 136   |
| [Fe( $\mu$ -pyz){Pt(CN) <sub>4</sub> }]<br>[Fe( $\mu$ -pyz){PtI <sub>2</sub> (CN) <sub>4</sub> }]                                                                                                    | 295 K; abrupt, 26 K hysteresis<br>390 K; abrupt, 17 K hysteresis | Yes                             | Alloys produced by reaction of [Fe( $\mu$ -pyz){Pt(CN) <sub>4</sub> }] with I <sub>2</sub> . [Fe( $\mu$ -pyz){PtI <sub>2</sub> (CN) <sub>4</sub> } <sub>n</sub> {Pt(CN) <sub>4</sub> } <sub>1-n</sub> ] ( $0 < n < 1$ ) exhibit consistently hysteretic spin-transitions, with $T_{1/2}$ increasing linearly with $n$ .                                                             | 137   |
| [Fe(NCEt) <sub>2</sub> ( $\mu$ -ebt <sub>z</sub> ) <sub>2</sub> ][BF <sub>4</sub> ] <sub>2</sub><br>[Fe(NCPr) <sub>2</sub> ( $\mu$ -ebt <sub>z</sub> ) <sub>2</sub> ][BF <sub>4</sub> ] <sub>2</sub> | 101 K; abrupt, 41 K hysteresis<br>190 K; gradual                 | Yes                             | SCO in the EtCN complex is only observed upon slow thermal scanning. In [Fe(NCEt) <sub>2n</sub> (NCPr) <sub>2-2n</sub> ( $\mu$ -ebt <sub>z</sub> ) <sub>2</sub> ][BF <sub>4</sub> ] <sub>2</sub> ( $0.72 \leq n < 1$ ) $T_{1/2}$ increases and the hysteresis narrows with larger PrCN content.                                                                                     | 138   |
| [Fe( $\mu$ -btzx) <sub>3</sub> ][ClO <sub>4</sub> ] <sub>2</sub><br>[Fe( $\mu$ -btix) <sub>3</sub> ][ClO <sub>4</sub> ] <sub>2</sub>                                                                 | 200 K; gradual<br>High-spin                                      | No                              | Compositions of [Fe( $\mu$ -btix) <sub>3n</sub> ( $\mu$ -btzx) <sub>3-3n</sub> ][ClO <sub>4</sub> ] <sub>2</sub> with $n \leq 0.2$ undergo gradual, incomplete SCO in two or three resolvable steps.                                                                                                                                                                                | 139   |
| [Fe(NCS) <sub>2</sub> ( $\mu$ -bpe) <sub>2</sub> ]·solvent<br>[Fe(NCBH <sub>3</sub> ) <sub>2</sub> ( $\mu$ -bpe) <sub>2</sub> ]·solvent                                                              | 84 K; abrupt<br>216 K; abrupt                                    | No                              | Two compositions of [Fe(NCS) <sub>2n</sub> (NCBH <sub>3</sub> ) <sub>2-2n</sub> ( $\mu$ -bpe) <sub>2</sub> ]·solvent with $n \geq 0.8$ undergo gradual SCO in two resolvable steps.                                                                                                                                                                                                 | 140   |
| [Fe(L <sup>F</sup> )(HL <sup>F</sup> )]·H <sub>2</sub> O<br>[Fe(L <sup>Cl</sup> )(HL <sup>Cl</sup> )]·H <sub>2</sub> O                                                                               | 317 K; abrupt<br>230 K; abrupt                                   | No                              | $T_{1/2}$ increases non-linearly for [Fe(H <sub>0.5</sub> L <sup>F</sup> ) <sub>2n</sub> (H <sub>0.5</sub> L <sup>Cl</sup> ) <sub>2-2n</sub> ]·H <sub>2</sub> O ( $0 < n < 1$ ). SCO is abrupt for $n < 0.2$ and $n > 0.8$ , but broadens as $n$ approaches 0.5.                                                                                                                    | 141   |
| [Fe(Me <sub>2</sub> 1,3-bpp) <sub>2</sub> ][ClO <sub>4</sub> ] <sub>2</sub><br>[Fe(Me1,3-bpp) <sub>2</sub> ][ClO <sub>4</sub> ] <sub>2</sub>                                                         | 378 K; gradual<br>184 K; abrupt                                  | No                              | SCO in [Fe(Me <sub>2</sub> 1,3-bpp) <sub>2n</sub> (Me1,3-bpp) <sub>2-2n</sub> ][ClO <sub>4</sub> ] <sub>2</sub> ( $n \leq 0.5$ ) shifts linearly to higher temperature and becomes more gradual as $n$ increases. Samples with $n > 0.5$ were mixed phase materials.                                                                                                                | 142   |

<sup>a</sup>An-atrz = *N*-[(4-methoxyphenyl)methylene]-4*H*-1,2,4-triazol-4-amine; ANTH-atrz = *N*-[(anthr-9-yl)methylene]-4*H*-1,2,4-triazol-4-amine; atrz = 4-amino-1,2,4-triazole; bpe = 1,2-*bis*(pyrid-4-yl)ethane; btix = 1,4-*bis*(1,2,4-triazol-1-ylmethyl)benzene; btzx = 1,4-*bis*(tetrazol-1-ylmethyl)benzene; ebtz = 1,2-*bis*(tetrazol-2-yl)ethane; H<sub>2</sub>L<sup>Cl</sup> = 2-(*{*5-chloro-2-hydroxyphenyl*}* methylene)hydrazinecarbothioamide; H<sub>2</sub>L<sup>F</sup> = 2-(*{*5-fluoro-2-hydroxyphenyl*}* methylene)hydrazinecarbothioamide; Me1,3-bpp = 2-(3-methylpyrazol-1-yl)-6-(1*H*-pyrazol-3-yl)pyridine; Me<sub>2</sub>1,3-bpp = 2-(3,5-dimethylpyrazol-1-yl)-6-(1*H*-pyrazol-3-yl)pyridine; PCA-atrz = *N*-[(pyren-1-yl)methylene]-4*H*-1,2,4-triazol-4-amine; PD-atrz = *N*-[(phenanthren-9-yl)methylene]-4*H*-1,2,4-triazol-4-amine; pyz = pyrazine; pyz<sup>NH<sub>2</sub></sup> = aminopyrazine; RhB-atrz = 3,6-*bis*(diethylamino)-9-(2-*{*[4*H*-1,2,4-triazol-4-ylamino]carbonyl*}* phenyl)xanthylum chloride; Htrz = 4*H*-1,2,4-triazole.



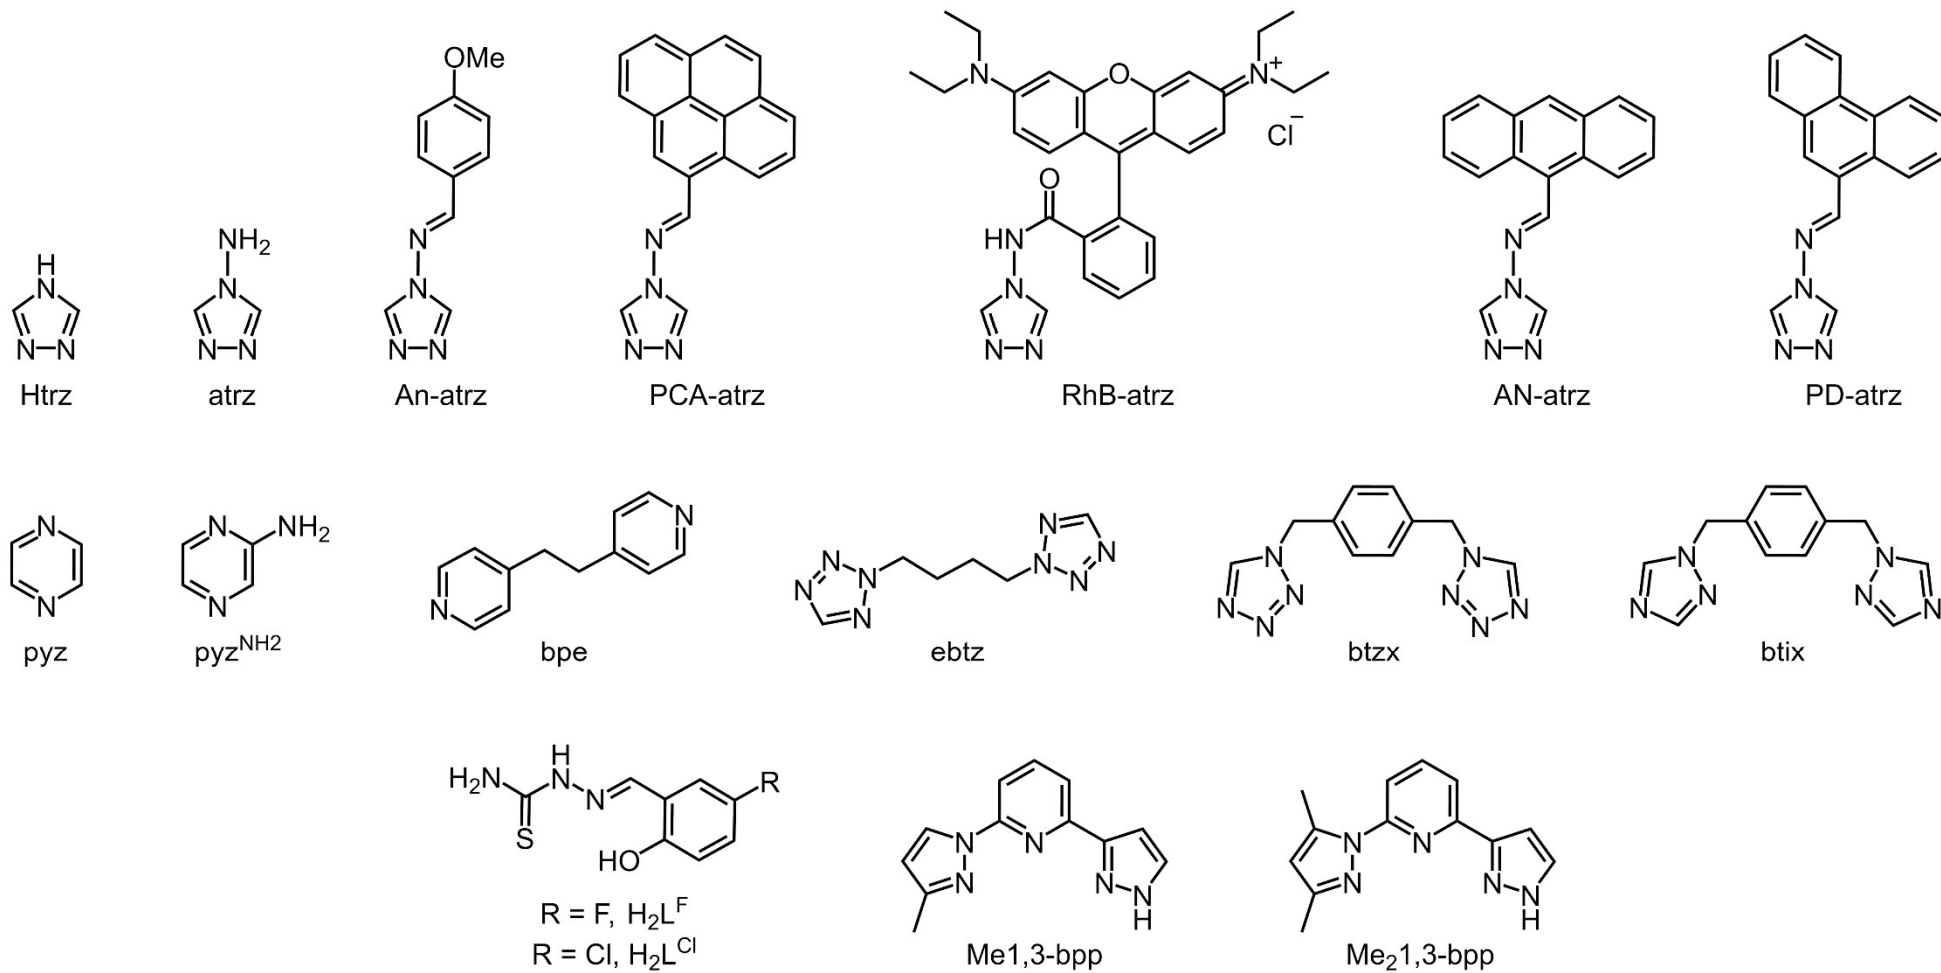

Scheme S6. Ligands listed in Table S6.

## References

1. P. Ghosh, C. M. Pask, H. B. Vasili, N. Yoshinari, T. Konno, O. Cespedes, C. Enachescu, P. Chakraborty and M. A. Halcrow, *J. Mater. Chem. C*, 2023, **11**, 12570–12582.
2. C. Baldé, C. Desplanches, F. Le Gac, P. Guionneau and J.-F. Létard, *Dalton Trans.*, 2014, **43**, 7820–7829.
3. C. Baldé, C. Desplanches, J.-F. Létard and G. Chastanet, *Polyhedron*, 2017, **123**, 138–144.
4. C. Baldé, C. Desplanches, P. Gülich, E. Freysz and J.-F. Létard, *Inorg. Chim. Acta*, 2008, **361**, 3529–3533.
5. P. Ganguli, P. Gülich and E. W. Müller, *Inorg. Chem.*, 1982, **21**, 3429–3433.
6. C. Baldé, C. Desplanches, A. Wattiaux, P. Guionneau, P. Gülich and J.-F. Létard, *Dalton Trans.*, 2008, 2702–2707.
7. M. S. Sylla, C. Baldé, N. Daro, C. Desplanches, M. Marchivie and G. Chastanet, *Eur. J. Inorg. Chem.*, 2018, 297–304.
8. T. Buchen, P. Poganiuch and P. Gülich, *J. Chem. Soc. Dalton Trans.*, 1994, 2285–2288.
9. T. Buchen, D. Schollmeyer and P. Gülich, *Inorg. Chem.*, 1996, **35**, 155–161.
10. E. W. Müller, J. Ensling, H. Spiering and P. Gülich, *Inorg. Chem.*, 1983, **22**, 2074–2078.
11. A. Hauser, P. Gülich and H. Spiering, *Inorg. Chem.*, 1986, **25**, 4245–4248.
12. J. Jung, G. Schmitt, L. Wiehl, A. Hauser, K. Knorr, H. Spiering and P. Gülich, *Z. Phys. B*, 1996, **100**, 523–534.
13. J. Jeftić and A. Hauser, *J. Phys. Chem. B*, 1997, **101**, 10262–10270.
14. J. Kusz, H. Spiering and P. Gülich, *J. Appl. Cryst.*, 2004, **37**, 589–595.
15. P. Chakraborty, M. Sy, H. Fourati, T. Delgado, M. Dutta, C. Das, C. Besnard, A. Hauser, C. Enachescu and K. Boukheddaden, *Phys. Chem. Chem. Phys.*, 2022, **24**, 982–994.
16. F. J. Valverde-Muñoz, R. G. Torres Ramírez, A. Ulhe, E. Trzop, M. Dutta, C. Das, P. Chakraborty and E. Collet, *CrystEngComm*, 2023, **25**, 3588–3597.
17. G. Lebedev, S. Pillet, C. Baldé, P. Guionneau, C. Desplanches and J.-F. Létard, *IOP Conf. Ser.: Mater. Sci. Eng.*, 2009, **5**, 012025.
18. S. Saha, P. Chandra and S. K. Mandal, *Physica B*, 2022, **642**, 414128.
19. N. Paradis, G. Chastanet, T. Palamarciuc, P. Rosa, F. Varret, K. Boukheddaden and J.-F. Létard, *J. Phys. Chem. C*, 2015, **119**, 20039–20050.
20. P. Adler, L. Wiehl, E. Meibner, C. P. Köhler, H. Spiering and P. Gülich, *J. Phys. Chem. Solids*, 1987, **48**, 517–525.
21. P. Gülich, R. Link and H. G. Steinhauser, *Inorg. Chem.*, 1978, **17**, 2509–2514.
22. H. Spiering, E. Meissner, H. Köppen, E. W. Müller and P. Gülich, *Chem. Phys.*, 1982, **68**, 65–71.
23. E. Meissner, H. Köppen, H. Spiering and P. Gülich, *Chem. Phys. Lett.*, 1983, **95**, 163–166.
24. R. Jakobi, H. Spiering, L. Wiehl, E. Gmelin and P. Gülich, *Inorg. Chem.*, 1988, **27**, 1823–1827.
25. C. P. Köhler, R. Jakobi, E. Meissner, L. Wiehl, H. Spiering and P. Gülich, *J. Phys. Chem. Solids*, 1990, **51**, 239–247.
26. R. Jakobi, H. Spiering and P. Gülich, *J. Phys. Chem. Solids*, 1992, **53**, 267–275.
27. T. Kohlhaas, H. Spiering and P. Gülich, *Z. Phys. B*, 1997, **102**, 455–459.
28. I. Sanner, E. Meissner, H. Köppen, H. Spiering and P. Gülich, *Chem. Phys.*, 1984, **86**, 227–233.
29. C. M. Pask, A. N. Kulak and M. A. Halcrow, *Eur. J. Inorg. Chem.*, doi: 10.1002/ejic.202400334.
30. M. A. Halcrow and G. Chastanet, *Polyhedron*, 2017, **136**, 5–12.

31. C. A. Tovee, C. A. Kilner, J. A. Thomas and M. A. Halcrow, *CrystEngComm*, 2009, **11**, 2069–2077.
32. M. A. Halcrow, H. B. Vasili, C. M. Pask, A. N. Kulak and O. Cespedes, *Dalton Trans.*, 2024, **53**, 6983–6992.
33. V. García-López, F. J. Orts-Mula, M. Palacios-Corella, J. M. Clemente-Juan, M. Clemente-León and E. Coronado, *Polyhedron*, 2018, **150**, 54–60.
34. N. Paradis, G. Chastanet and J.-F. Létard, *Eur. J. Inorg. Chem.*, 2012, 3618–3624.
35. N. Paradis, G. Chastanet, F. Varret and J.-F. Létard, *Eur. J. Inorg. Chem.*, 2013, 968–974.
36. R. Diego, O. Roubeau and G. Aromí, *Chem. Sq.*, 2021, 5–1.
37. Z. Yu, T. Kuroda-Sowa, H. Kume, T. Okubo, M. Maekawa and M. Munakata, *Bull. Chem. Soc. Jpn.*, 2009, **82**, 333–337.
38. S. Zheng, M. A. Siegler, J. S. Costa, W.-T. Fu and S. Bonnet, *Eur. J. Inorg. Chem.*, 2013, 1033–1042.
39. X. Li, D. Zhang, Y. Qian, W. Liu, C. Mathonière, R. Clérac and X. Bao, *J. Am. Chem. Soc.*, 2023, **145**, 9564–9570.
40. B. Drahoš, I. Šalitroš, I. Císařová and R. Herchel, *Dalton Trans.*, 2021, **50**, 11147–11157.
41. H. Wang, C. Baldé, A. Grosjean, C. Desplanches, P. Guionneau and G. Chastanet, *Dalton Trans.*, 2018, **47**, 14741–14750.
42. P. Chakraborty, A. Tissot, L. Peterhans, L. Guénée, C. Besnard, P. Pattison and A. Hauser, *Phys. Rev. B*, 2013, **87**, 214306.
43. T. Delgado and A.-L. Pelé, *Crystals*, 2024, **14**, 210.
44. A. B. Gaspar, V. Ksenofontov, S. Reiman, P. Gütllich, A. L. Thompson, A. E. Goeta, M. C. Muñoz and J. A. Real, *Chem. – Eur. J.*, 2006, **12**, 9289–9298.
45. A. Moneo-Corcuera, D. Nieto-Castro, J. Cirera, V. Gómez, J. Sanjosé-Orduna, C. Casadevall, G. Molnár, A. Bousseksou, T. Parella, J. M. Martínez-Agudo, J. Lloret-Fillol, M. H. Pérez-Temprano, E. Ruiz and J. R. Galán-Mascarós, *Chem*, 2023, **9**, 377–393.
46. R. Ohtani, S. Egawa, M. Nakaya, H. Ohmagari, M. Nakamura, L. F. Lindoy and S. Hayami, *Inorg. Chem.*, 2016, **55**, 3332–3337.
47. S. Hayami, D. Urakami, Y. Kojima, H. Yoshizaki, Y. Yamamoto, K. Kato, A. Fuyuhiko, S. Kawata and K. Inoue, *Inorg. Chem.*, 2010, **49**, 1428–1432.
48. L. G. Lavrenova, V. N. Ikorskii, V. A. Varnek, I. M. Oglezneva and S. V. Larionov, *J. Struct. Chem.*, 1993, **34**, 960–965.
49. V. A. Varnek and L. G. Lavrenova, *J. Struct. Chem.*, 1994, **35**, 842–850.
50. V. A. Varnek and L. G. Lavrenova, *J. Struct. Chem.*, 1995, **36**, 97–103.
51. S. B. Erenburg, N. V. Bausk, V. A. Varnek and L. G. Lavrenova, *J. Magn. Magn. Mater.*, 1996, **157–158**, 595–596.
52. S. B. Erenburg, N. V. Bausk, L. G. Lavrenova, V. A. Varnek and L. N. Mazalov, *Solid State Ionics*, 1997, **101–103**, 571–577.
53. V. A. Varnek and L. G. Lavrenova, *J. Struct. Chem.*, 1997, **38**, 850–852.
54. Yu. G. Shvedenkov, V. N. Ikorskii, L. G. Lavrenova, V. A. Drebuschak and N. G. Yudina, *J. Struct. Chem.*, 1997, **38**, 578–584.
55. V. A. Varnek, L. G. Lavrenova and S. A. Gromilov, *J. Struct. Chem.*, 1997, **38**, 585–592.
56. K. Jenni, L. Scherthan, I. Faus, J. Marx, C. Strohm, M. Herlitschke, H.-C. Wille, P. Würtz, V. Schünemann and J. A. Wolny, *Phys. Chem. Chem. Phys.*, 2017, **19**, 18880–18889.
57. O. G. Shakirova, Yu. G. Shvedenkov, D. Yu. Naumov, N. F. Beizel', L. A. Sheludyakova, L. S. Dovlitova, V. V. Malakhov and L. G. Lavrenova, *J. Struct. Chem.*, 2002, **43**, 601–607.

58. E. Coronado, J. R. Galán-Mascarós, M. Monrabal-Capilla, J. García-Martínez and P. Pardo-Ibáñez, *Adv. Mater.*, 2007, **19**, 1359–1361.
59. J. R. Galán-Mascarós, E. Coronado, A. Forment-Aliaga, M. Monrabal-Capilla, E. Pinilla-Cienfuegos and M. Ceolin, *Inorg. Chem.*, 2010, **49**, 5706–5714.
60. S. Titos-Padilla, J. M. Herrera, X.-W. Chen, J. J. Delgado and E. Colacio, *Angew. Chem. Int. Ed.*, 2011, **50**, 3290–3293.
61. C. Lefter, S. Tricard, H. Peng, G. Molnár, L. Salmon, P. Demont, A. Rotaru and A. Bousseksou, *J. Phys. Chem. C*, 2015, **119**, 8522–8529.
62. C. Baldé, C. Desplanches, M. Grunert, Y. Wei, P. Gütllich and J.-F. Létard, *Eur. J. Inorg. Chem.*, 2008, 5382–5389.
63. C. Baldé, M. S. Sylla, C. Desplanches and G. Chastanet, *Polyhedron*, 2019, **159**, 84–92.
64. R. Tanasa, C. Enachescu, A. Stancu, J. Linarès, E. Codjovi, F. Varret and J. Haasnoot, *Phys. Rev. B*, 2005, **71**, 014431.
65. R. Tanasa, C. Enachescu, A. Stancu, F. Varret, J. Linarès and E. Codjovi, *Polyhedron*, 2007, **26**, 1820–1824.
66. A. Rotaru, M. M. Dîrtu, C. Enachescu, R. Tanasa, J. Linarès, A. Stancu and Y. Garcia, *Polyhedron*, 2009, **28**, 2531–2536.
67. J.-P. Martin, J. Zarembowitch, A. Dworkin, J. G. Haasnoot and E. Codjovi, *Inorg. Chem.*, 1994, **33**, 2617–2623.
68. E. Codjovi, N. Menéndez, J. Jeftic and F. Varret, *C. R. Acad. Sci. Chim.*, 2001, **4**, 181–188.
69. N. Nègre, C. Conséjo, M. Goiran, A. Bousseksou, F. Varret, J.-P. Tuchagues, R. Barbaste, S. Askénazy and J. G. Haasnoot, *Physica B*, 2001, **294–295**, 91–95.
70. C. Enachescu, J. Linarès and F. Varret, *J. Phys.: Condens. Matter*, 2001, **13** 2481–2495.
71. J.-P. Martin, J. Zarembowitch, A. Bousseksou, A. Dworkin, J. G. Haasnoot and F. Varret, *Inorg. Chem.*, 1994, **33**, 6325–6333.
72. A. Desaix, O. Roubeau, J. Jeftic, J.G. Haasnoot, K. Boukheddaden, E. Codjovi, J. Linarès, M. Noguès and F. Varret, *Eur. Phys. J. B*, 1998, **6**, 183–193.
73. J. Kusz, R. Bronisz, M. Zubko and G. Bednarek, *Chem. – Eur. J.*, 2011, **17**, 6807–6820.
74. P. Chakraborty, C. Enachescu, C. Walder, R. Bronisz and A. Hauser, *Inorg. Chem.*, 2012, **51**, 9714–9722.
75. P. Chakraborty, C. Enachescu and A. Hauser, *Eur. J. Inorg. Chem.*, 2013, 770–780.
76. P. Chakraborty, C. Enachescu, A. Humair, L. Egger, T. Delgado, A. Tissot, L. Guénée, C. Besnard, R. Bronisz and A. Hauser, *Dalton Trans.*, 2014, **43**, 17786–17796.
77. R.-M. Stan, R. Gaina, C. Enachescu, R. Tanasa, A. Stancu and R. Bronisz, *J. Appl. Phys.*, 2015, **117**, 17B323.
78. C. Das, S. Dey, A. Adak, C. Enachescu and P. Chakraborty, *Cryst. Growth Des.*, 2023, **23**, 3496–3508.
79. M. S. Sylla, C. Baldé, N. Daro and G. Chastanet, *J. Soc. Ouest-Afr. Chim.*, 2017, **43**, 37–47.
80. T. Tayagaki, A. Galet, G. Molnár, M. C. Muñoz, A. Zwick, K. Tanaka, J.-A. Real and A. Bousseksou, *J. Phys. Chem. B*, 2005, **109**, 14859–14867.
81. Y. Avila, R. Terrero, P. M. Crespo, L. A. Diaz-Paneque, M. Gonzalez, M. Avila and E. Reguera, *Eur. J. Inorg. Chem.*, 2021, 3969–3980.
82. B. R. Mullaney, L. Goux-Capes, D. J. Price, G. Chastanet, J.-F. Létard and C. J. Kepert, *Nat. Commun.*, 2017, **8**, 1053.
83. J.-S. M. Lee, Y. Fujiwara, S. Kitagawa and S. Horike, *Chem. Mater.*, 2019, **31**, 4205–4212.

84. K. Bode, P. Gütllich and H. Köppen, *Inorg. Chim. Acta*, 1980, **42**, 281–284.
85. A. Hauser, *Chem. Phys. Lett.*, 1990, **173**, 507–512.
86. S. Schenker, A. Hauser, W. Wang and I. Y. Chan, *Chem. Phys. Lett.*, 1998, **297**, 281–286.
87. A. Hauser, N. Amstutz, S. Delahaye, A. Sadki, S. Schenker, R. Sieber and M. Zerara, *Struct. Bonding (Berlin)*, 2004, **106**, 81–96.
88. A. Vef, U. Manthe, P. Gütllich and A. Hauser, *J. Chem. Phys.*, 1994, **101**, 9326–9332.
89. F. Renz, H. Oshio, V. Ksenofontov, M. Waldeck, H. Spiering and P. Gütllich, *Angew. Chem. Int. Ed.*, 2000, **39**, 3699–3700.
90. S. Schenker, A. Hauser, W. Wang and I. Y. Chan, *J. Chem. Phys.*, 1998, **109**, 9870–9878.
91. I. Krivokapic, P. Chakraborty, R. Bronisz, C. Enachescu and A. Hauser, *Angew. Chem. Int. Ed.*, 2010, **49**, 8509–8512.
92. I. Krivokapic, P. Chakraborty, C. Enachescu, R. Bronisz and A. Hauser, *Inorg. Chem.*, 2011, **50**, 1856–1861.
93. A. Ozarowski and B. R. McGarvey, *Inorg. Chem.*, 1989, **28**, 2262–2266.
94. P. S. Rao, A. Reuveni, B. R. McGarvey and P. Gütllich, *Inorg. Chem.*, 1981, **20**, 204–207.
95. H. Daubric, J. Kliava, P. Guionneau, D. Chasseau, J.-F. Létard and O. Kahn, *J. Phys.: Condens. Matter*, 2000, **12**, 5481–5494.
96. A. Ozarowski, B. R. McGarvey, A. B. Sarkar and J. E. Drake, *Inorg. Chem.*, 1988, **27**, 628–635 and 1988, **27**, 2560 (correction).
97. P. J. Kunkeler, P. J. van Koningsbruggen, J. P. Cornelissen, A. N. van der Horst, A. M. van der Kraan, A. L. Spek, J. G. Haasnoot and J. Reedijk, *J. Am. Chem. Soc.*, 1996, **118**, 2190–2197.
98. P. E. Doan and B. R. McGarvey, *Inorg. Chem.*, 1990, **29**, 874–876.
99. M. Shirai, N. Yonemura, T. Tayagaki, K. Kan’no, K. Tanaka, *J. Luminesc.*, 2001, **94–95**, 529–532.
100. R. Docherty, F. Tuna, C. A. Kilner, E. J. L. McInnes and M. A. Halcrow, *Chem. Commun.*, 2012, **48**, 4055–4057.
101. S. V. Tumanov, S. L. Veber, S. Greatorex, M. A. Halcrow and M. V. Fedin, *Inorg. Chem.*, 2018, **57**, 8709–8713.
102. R. C. W. Sung and B. R. McGarvey, *Inorg. Chem.*, 1999, **38**, 3644–3650.
103. C. M. Pask, S. Greatorex, R. Kulmaczewski, A. Baldansuren, E. J. L. McInnes, F. Bamiduro, M. Yamada, N. Yoshinari, T. Konno and M. A. Halcrow, *Chem. – Eur. J.*, 2020, **26**, 4833–4841.
104. A. Ozarowski, Y. Shunzhong, B. R. McGarvey, A. Mislankar and J. E. Drake, *Inorg. Chem.*, 1991, **30**, 3167–3174.
105. W. Vreugdenhil, J. G. Haasnoot, O. Khan, P. Thuéry and J. Reedijk, *J. Am. Chem. Soc.*, 1987, **109**, 5272–5273.
106. O. Roubeau, M. de Vos, A.F. Stassen, R. Burriel, J. G. Haasnoot and J. Reedijk, *J. Phys. Chem. Solids*, 2003, **64**, 1003–1013.
107. C. Carbonera, C. A. Kilner, J.-F. Létard and M. A. Halcrow, *Dalton Trans.*, 2007, 1284–1292.
108. I. Capel Berdiell, R. Kulmaczewski, N. Shahid, O. Cespedes and M. A. Halcrow, *Chem. Commun.*, 2021, **57**, 6566–6569.
109. T. D. Roberts, C. M. Pask, I. Capel Berdiell, F. Tuna and M. A. Halcrow, *J. Mater. Chem. C*, 2022, **10**, 16353–16362.
110. X. Yang, A. Enriquez-Cabrera, D. Toha, Y. Coppel, L. Salmon and A. Bousseksou, *Dalton Trans.*, 2023, **52**, 10828–10834.

111. X. Yang, A. Enriquez-Cabrera, K. Jacob, Y. Coppel, L. Salmon and A. Bousseksou, *Dalton Trans.*, 2024, **53**, 6830–6838.
112. M. Książek, M. Weselski, M. Kaźmierczak, A. Półrołniczak, A. Katrusiak, D. Paliwoda, J. Kusz and R. Bronisz, *Chem. – Eur. J.*, 2024, **30**, e202302887.
113. E. Coronado, M. C. Giménez-López, C. Gimenez-Saiz, J. M. Martínez-Agudo and F. M. Romero, *Polyhedron*, 2003, **22**, 2375–2380.
114. M. Yamada, H. Hagiwara, H. Torigoe, N. Matsumoto, M. Kojima, F. Dahan, J.-P. Tuchagues, N. Re and S. Iijima, *Chem. – Eur. J.*, 2006, **12**, 4536–4549.
115. H. Hagiwara, N. Matsumoto, S. Iijima and M. Kojima, *Inorg. Chim. Acta*, 2011, **366**, 283–289.
116. K. Nishi, N. Matsumoto, S. Iijima, M. A. Halcrow, Y. Sunatsuki and M. Kojima, *Inorg. Chem.*, 2011, **50**, 11303–11305.
117. K. Nishi, H. Kondo, T. Fujinami, N. Matsumoto, S. Iijima, M. A. Halcrow, Y. Sunatsuki and M. Kojima, *Eur. J. Inorg. Chem.*, 2013, 927–933.
118. T. Fujinami, K. Nishi, D. Hamada, K. Murakami, N. Matsumoto, S. Iijima, M. Kojima and Y. Sunatsuki, *Inorg. Chem.*, 2015, **54**, 7291–7300.
119. H. Phan, S. M. Benjamin, E. Steven, J. S. Brooks and M. Shatruk, *Angew. Chem. Int. Ed.*, 2015, **54**, 823–827.
120. W. Phonsri, B. A. I. Lewis, G. N. L. Jameson and K. S. Murray, *Chem. Commun.*, 2019, **55**, 14031–14034.
121. M. D. Darawsheh, L. A. Barrios, O. Roubeau, S. J. Teat and G. Aromí, *Chem. Commun.*, 2017, **53**, 569–572.
122. M. Darawsheh, L. A. Barrios, O. Roubeau, S. J. Teat and G. Aromí, *Angew. Chem. Int. Ed.*, 2018, **57**, 13509–13513.
123. N. Capó, L. A. Barrios, J. Cardona, J. Ribas-Ariño, S. J. Teat, O. Roubeau and G. Aromí, *Chem. Commun.*, 2022, **58**, 10969–10972.
124. O. Kahn, L. Sommier and E. Codjovi, *Chem. Mater.*, 1997, **9**, 3199–3205.
125. O. Kahn and C. Jay Martinez, *Science*, 1998, **279**, 44–48.
126. M. Giménez-Marqués, M. L. García-Sanz de Larrea and E. Coronado, *J. Mater. Chem. C*, 2015, **3**, 7946–7953.
127. O. G. Shakirova, L. G. Lavrenova, Yu. G. Shvedenkov, V. N. Ikorskii, V. A. Varnek, L. A. Sheludyakova, V. L. Varand, T. A. Krieger, and S. V. Larionov, *J. Struct. Chem.*, 2000, **41**, 790–797.
128. O. G. Shakirova, M. Grunert, D. Yu. Naumov, P. Gütllich and L. G. Lavrenova *J. Struct. Chem.*, 2010, **51**, 45–52.
129. S. Rat, M. Piedrahita-Bello, L. Salmon, G. Molnár, P. Demont and A. Bousseksou, *Adv. Mater.*, 2018, **30**, 1705275.
130. M. Piedrahita-Bello, K. Ridier, M. Mikolasek, G. Molnár, W. Nicolazzi, L. Salmon and A. Bousseksou, *Chem. Commun.*, 2019, **55**, 4769–4772.
131. M. Piedrahita-Bello, B. Martin, L. Salmon, G. Molnár, P. Demont and A. Bousseksou, *J. Mater. Chem. C*, 2020, **8**, 6042–6051.
132. I. Soroceanu, S.-L. Lupu, I. Rusu, M. Piedrahita-Bello, L. Salmon, G. Molnár, P. Demont, A. Bousseksou and A. Rotaru, *J. Phys.: Condens. Matter*, 2020, **32**, 264002.
133. A. Enríquez-Cabrera, L. Routaboul, L. Salmon and A. Bousseksou, *Dalton Trans.*, 2019, **48**, 16853–16856.
134. C.-F. Wang, R.-F. Li, X.-Y. Chen, R.-J. Wei, L.-S. Zheng and J. Tao, *Angew. Chem. Int. Ed.*, 2015, **54**, 1574–1577.

135. C.-F. Wang, G.-Y. Yang, Z.-S. Yao and J. Tao, *Chem. – Eur. J.*, 2018, **24**, 3218–3224.
136. Y. Gong, Z.-H. Li, X. Yan, Y.-Q. Wang, C.-Y. Zhao, W.-K. Han, Q.-T. Hu, H.-S. Lu and Z.-G. Gu, *Chem. – Eur. J.*, 2020, **26**, 12472–12480.
137. R. Ohtani, K. Yoneda, S. Furukawa, N. Horike, S. Kitagawa, A. B. Gaspar, M. C. Muñoz, J. A. Real and M. Ohba, *J. Am. Chem. Soc.*, 2011, **133**, 8600–8605.
138. M. Książek, M. Weselski, M. Kaźmierczak, A. Tołoczko, M. Siczek, P. Durlak, J. A. Wolny, V. Schünemann, J. Kusz and R. Bronisz, *Chem. – Eur. J.*, 2020, **26**, 14419–14434.
139. N. C. Galve, E. Coronado, M. Giménez-Marqués and G. M. Espallargas, *Inorg. Chem.*, 2014, **53**, 4482–4490.
140. H. Dote, M. Kaneko, K. Inoue and S. Nakashima, *Bull. Chem. Soc. Jpn.*, 2018, **91**, 71–81.
141. Y.-Y. Wu, Z.-Y. Li, S. Peng, Z.-Y. Zhang, H.-M. Cheng, H. Su, W.-Q. Hou, F.-L. Yang, S.-Q. Wu, O. Sato, J.-W. Dai, W. Li and X.-H. Bu, *J. Am. Chem. Soc.*, 2024, **146**, 8206–8215.
142. C. Bartual-Murgui, C. Pérez-Padilla, S. J. Teat, O. Roubeau and G. Aromí, *Inorg. Chem.*, 2020, **59**, 12132–12142.
143. a) D. Unruh, P. Homenya, M. Kumar, R. Sindelar, Y. Garcia and F. Renz, *Dalton Trans.*, 2016, **45**, 14008–14018;  
b) G. Chastanet, C. Desplanches, C. Baldé, P. Rosa, M. Marchivie and P. Guionneau, *Chem. Sq.*, 2018, 2–2.
144. a) M. Marchivie, P. Guionneau, J.-F. Létard, D. Chasseau and J. A. K. Howard, *J. Phys. Chem. Solids*, 2004, **65**, 17–23;  
b) G. A. Craig, J. S. Costa, S. J. Teat, O. Roubeau, D. S. Yufit, J. A. K. Howard and G. Aromí, *Inorg. Chem.*, 2013, **52**, 7203–7209.
145. a) G. A. Craig and M. Murrie, *Chem. Soc. Rev.*, 2015, **44**, 2135–2147;  
b) A. Sarkar, S. Dey and G. Rajaraman, *Chem. – Eur. J.*, 2020, **26**, 14036–14058.
146. S. Hayami, M. R. Karim and Y. H. Lee, *Eur. J. Inorg. Chem.*, 2013, 683–696.
